# Supplementary material for: Salt–cocrystal continuum for photofunction modulation: stimuli-responsive fluorescence color-tuning of pyridine-modified intramolecular charge-transfer dyes and acid complexes
Source: Royal Society of Chemistry journal article supplement (doi:10.1039/c9tc02524c), 2019-01-01
Supplement: c9tc02524c1.pdf [file c9tc02524c1.pdf]

## Supporting Information

# Salt–cocrystal continuum for photofunction modulation: Stimuli-responsive fluorescence color-tuning of pyridine-modified intramolecular charge–transfer dyes and acid complexes

Yoshio Yano, Toshikazu Ono,\* Sou Hatanaka, Daniel T. Gryko, and Yoshio Hisaeda\*

**Fig. S1** Crystal structure of **1** (123 K).

**Table S1** Crystallographic data for **1** (123 K).

**Fig. S2** Crystal structure of **1** (298 K).

**Table S2** Crystallographic data for **1** (298 K).

**Fig. S3** Crystal structure of **1•a** (123 K).

**Table S3** Crystallographic data for **1•a** (123 K).

**Fig. S4** Crystal structure of **1•a** (298 K).

**Table S4** Crystallographic data for **1•a** (298 K).

**Fig. S5** Crystal structure of **1•b** (123 K).

**Table S5** Crystallographic data for **1•b** (123 K).

**Fig. S6** Crystal structure of **1•b** (298 K).

**Table S6** Crystallographic data for **1•b** (298 K).

**Fig. S7** Crystal structure of **1•c** (123 K).

**Table S7** Crystallographic data for **1•c** (123 K).

**Fig. S8** Crystal structure of **1•c** (298 K).

**Table S8** Crystallographic data for **1•c** (298 K).

**Fig. S9** Crystal structure of **1•d**  $\supset$  CH<sub>2</sub>Cl<sub>2</sub> (123 K).

**Table S9** Crystallographic data for **1•d**  $\supset$  CH<sub>2</sub>Cl<sub>2</sub> (123 K).

**Fig. S10** Crystal structure of **1•e** (123 K).

**Table S10** Crystallographic data for **1•e** (123 K).

**Fig. S11** Crystal structure of **1•e** (298 K).

**Table S11** Crystallographic data for **1•e** (298 K).

**Fig. S12** Crystal structure of **1•f** (123 K).

**Table S12** Crystallographic data for **1•f** (123 K).

**Fig. S13** Crystal structure of **1•f** (298 K).

**Table S13** Crystallographic data for **1•f** (298 K).

**Fig. S14** Crystal structure of **1•f**  $\supset$  CH<sub>2</sub>Cl<sub>2</sub> (123 K).

**Table S14** Crystallographic data for **1•f**⊃CH<sub>2</sub>Cl<sub>2</sub> (123 K).

**Fig. S15** Crystal structure of **1•f**⊃CH<sub>2</sub>Cl<sub>2</sub> (298 K).

**Table S15** Crystallographic data for **1•f**⊃CH<sub>2</sub>Cl<sub>2</sub> (298 K).

**Fig. S16** Crystal structure of **1•g**⊃CH<sub>2</sub>Cl<sub>2</sub> (123 K).

**Table S16** Crystallographic data for **1•g**⊃CH<sub>2</sub>Cl<sub>2</sub> (123 K).

**Fig. S17** Crystal structure of **1•h**⊃H<sub>2</sub>O (123 K).

**Table S17** Crystallographic data for **1•h**⊃H<sub>2</sub>O (123 K).

**Fig. S18** Crystal structure of **1•h**⊃CH<sub>3</sub>OH (123 K).

**Table S18** Crystallographic data for **1•h**⊃CH<sub>3</sub>OH (123 K).

**Fig. S19** Crystal structure of **1•h**⊃CH<sub>3</sub>OH (298 K).

**Table S19** Crystallographic data for **1•h**⊃CH<sub>3</sub>OH (298 K).

**Table S20** Elemental analysis of **1**.

**Table S21** The p*K*<sub>a</sub> of **a-h** and Δp*K*<sub>a</sub> (p*K*<sub>a</sub> (**1**) - p*K*<sub>a</sub> (acid)).

**Fig. S20** PXRD patterns of **1•acid** (upper) and corresponding simulation pattern from SCXRD.

**Fig. S21** IR spectra of **1•f** (a) 400-4000 cm<sup>-1</sup>, (b) 1000-2000 cm<sup>-1</sup>, and **1•f**⊃CH<sub>2</sub>Cl<sub>2</sub> (c) 400-4000 cm<sup>-1</sup>, (d) 1000-2000 cm<sup>-1</sup>.

**Fig. S22** PXRD patterns of **1•f**⊃CH<sub>2</sub>Cl<sub>2</sub>, after heating to 110°C, and after exposure to CH<sub>2</sub>Cl<sub>2</sub> vapor against resulting powder.

**Fig. S23** UV-vis diffuse-reflectance spectra (black line), emission spectra (red line), and excitation spectra (dotted line) of **1•acid**.

**Fig. S24** Emission decay curves (black line), fits (red line), and instrument response function (IRF) of **1** and **1•acid**.

**Table S22** Summary of lifetime analyses for **1** and **1•acid**.

**Fig. S25** Photographs of **1** and **1•acid** under fluorescence microscope.

**Fig. S26** TG analyzes of **1** (red line), **1•f** (green line), and **1•f**⊃CH<sub>2</sub>Cl<sub>2</sub> (blue line).

**Fig. S27** (a) Emission spectra of **1•d** and **1•d**⊃CH<sub>2</sub>Cl<sub>2</sub>. Excitation at 370 nm. (b) Schematic illustration of emission color tuning depends on desorption and inclusion of complexes.

**Fig. S28** (a) Emission spectra of **1•f**, and after fuming TEA vapor. (b) Photo of **1•f**, and after fuming TEA vapor.

**Table S23** Mixing condition of **1** and **f** in CH<sub>2</sub>Cl<sub>2</sub>.

**Table S24** Mixing condition of **1** and **g** in CHCl<sub>3</sub>.

**Fig. S29** (a) UV-vis spectra of mixture of **1** and **f** in CH<sub>2</sub>Cl<sub>2</sub>, (b) Emission spectra of mixture of **1** and **f** in CH<sub>2</sub>Cl<sub>2</sub>, (c) UV-vis spectra of mixture of **1** and **g** in CHCl<sub>3</sub> (d) Emission spectra of mixture of **1** and **g** in CHCl<sub>3</sub>, (e) Relationship between emission intensity at 412 nm and equivalent of acid (**g**) to **1**.

**Fig. S30** Molecular orbital of **1**.

**Table S25** Low-lying spin-singlet excited states of the **1** calculated using the B3LYP/6-31G(d) method.

**Fig. S31** Representative MOs of the **1**.

**Fig. S32** Representative electron density difference maps (EDDM) between the electronic ground and excited states of **1**.

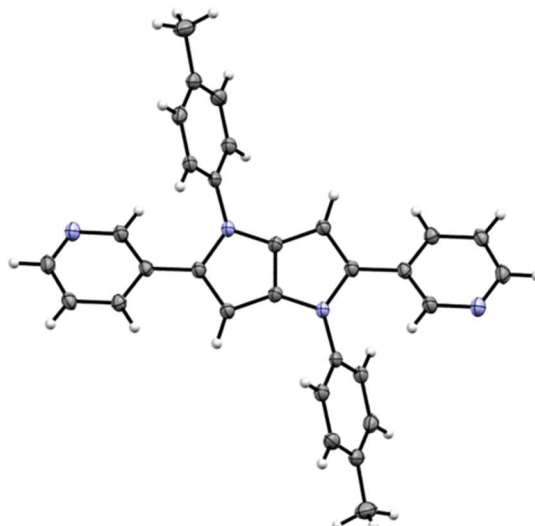

**Fig. S1** Crystal structure of **1** (123 K). Ellipsoids are plotted at the 50% probability level.

**Table S1** Crystallographic data for **1** (123 K).

| Compound                                             | <b>1</b>                                       |
|------------------------------------------------------|------------------------------------------------|
| CCDC No.                                             | 1910438                                        |
| empirical formula                                    | C <sub>30</sub> H <sub>24</sub> N <sub>4</sub> |
| formula weight                                       | 440.53                                         |
| temperature [K]                                      | 123                                            |
| wavelength [Å]                                       | 0.71073                                        |
| crystal system                                       | triclinic                                      |
| space group                                          | P -1                                           |
| <i>a</i> [Å]                                         | 6.0824(4)                                      |
| <i>b</i> [Å]                                         | 7.1390(7)                                      |
| <i>c</i> [Å]                                         | 13.6977(15)                                    |
| $\alpha$ [°]                                         | 89.603(8)                                      |
| $\beta$ [°]                                          | 77.345(8)                                      |
| $\gamma$ [°]                                         | 82.266(7)                                      |
| Volume [Å <sup>3</sup> ]                             | 574.90(9)                                      |
| <i>Z</i>                                             | 1                                              |
| Density (calculated) [g/cm <sup>3</sup> ]            | 1.272                                          |
| Absorption coefficient [mm <sup>-1</sup> ]           | 0.076                                          |
| <i>F</i> (000)                                       | 232.0                                          |
| $\theta$ [°]                                         | 2.880 to 26.368                                |
| Reflections collected                                | 3846                                           |
| Independent reflections                              | 2335 [ <i>R</i> <sub>(int)</sub> = 0.0199]     |
| Data / restraints / parameters                       | 2335 / 0 / 155                                 |
| Goodness-of-fit on <i>F</i> <sup>2</sup>             | 0.989                                          |
| <i>R</i> 1 <sup>a</sup> [ <i>I</i> > 2σ( <i>I</i> )] | 0.0456                                         |
| <i>wR</i> 2 <sup>b</sup> (all data)                  | 0.1377                                         |
| Largest diff. peak and hole [e.Å <sup>-3</sup> ]     | 0.24 and -0.25                                 |

a:  $R1 = (\sum ||F_o| - |F_c||) / (\sum |F_o|)$ . b:  $wR2 = [\sum w(F_o^2 - F_c^2)^2 / \sum wF_o^4]^{1/2}$ , where  $w = 1 / [\sigma^2(F_o^2) + (0.0900(F_o^2 + 2F_c^2)/3)^2 + 0.1400(F_o^2 + 2F_c^2)/3]$

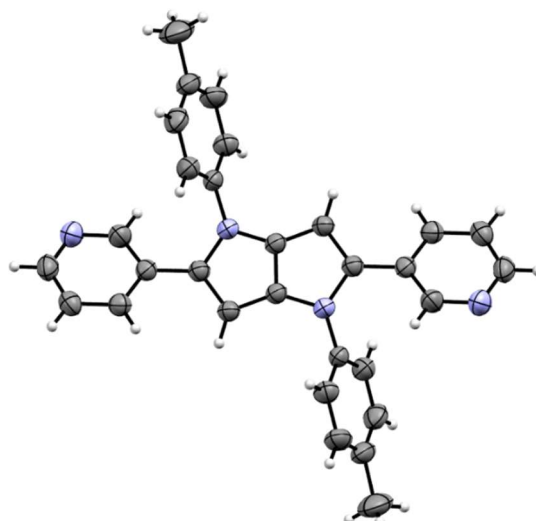

**Fig. S2** Crystal structure of **1** (298 K). Ellipsoids are plotted at the 50% probability level.

**Table S2** Crystallographic data for **1** (298 K).

| Compound                                                      | <b>1</b>                                       |
|---------------------------------------------------------------|------------------------------------------------|
| CCDC No.                                                      | 1910439                                        |
| empirical formula                                             | C <sub>30</sub> H <sub>24</sub> N <sub>4</sub> |
| formula weight                                                | 440.53                                         |
| temperature [K]                                               | 298                                            |
| wavelength [Å]                                                | 0.71073                                        |
| crystal system                                                | triclinic                                      |
| space group                                                   | P -1                                           |
| <i>a</i> [Å]                                                  | 6.1699(4)                                      |
| <i>b</i> [Å]                                                  | 7.2595(5)                                      |
| <i>c</i> [Å]                                                  | 13.6139(8)                                     |
| $\alpha$ [°]                                                  | 89.162(5)                                      |
| $\beta$ [°]                                                   | 79.508(5)                                      |
| $\gamma$ [°]                                                  | 80.710(5)                                      |
| Volume [Å <sup>3</sup> ]                                      | 591.64(7)                                      |
| <i>Z</i>                                                      | 1                                              |
| Density (calculated) [g/cm <sup>3</sup> ]                     | 1.236                                          |
| Absorption coefficient [mm <sup>-1</sup> ]                    | 0.074                                          |
| <i>F</i> (000)                                                | 232.0                                          |
| $\theta$ [°]                                                  | 2.843 to 26.370                                |
| Reflections collected                                         | 6300                                           |
| Independent reflections                                       | 2412 [ <i>R</i> <sub>(int)</sub> = 0.0169]     |
| Data / restraints / parameters                                | 2412 / 0 / 155                                 |
| Goodness-of-fit on <i>F</i> <sup>2</sup>                      | 1.036                                          |
| <i>R</i> 1 <sup>a</sup> [ <i>I</i> > 2 $\sigma$ ( <i>I</i> )] | 0.0381                                         |
| <i>wR</i> 2 <sup>b</sup> (all data)                           | 0.1098                                         |
| Largest diff. peak and hole [e.Å <sup>-3</sup> ]              | 0.17 and -0.17                                 |

a:  $R1 = (\sum ||F_o| - |F_c||) / (\sum |F_o|)$ . b:  $wR2 = [\sum w(F_o^2 - F_c^2)^2 / \sum wF_o^4]^{1/2}$ , where  $w = 1 / [\sigma^2(F_o^2) + (0.0520(F_o^2 + 2F_c^2)/3)^2 + 0.1050(F_o^2 + 2F_c^2)/3]$

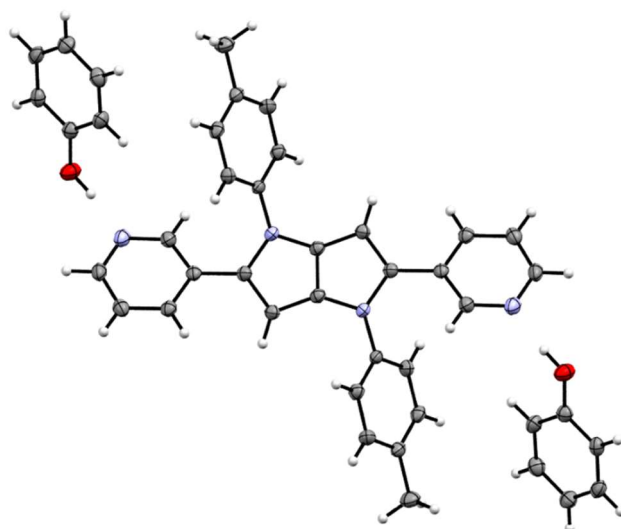

**Fig. S3** Crystal structure of **1•a** (123 K). Ellipsoids are plotted at the 50% probability level.

**Table S3** Crystallographic data for **1•a** (123 K).

| Compound                                             | <b>1•a</b>                                                    |
|------------------------------------------------------|---------------------------------------------------------------|
| CCDC No.                                             | 1910440                                                       |
| empirical formula                                    | C <sub>42</sub> H <sub>36</sub> N <sub>4</sub> O <sub>2</sub> |
| formula weight                                       | 628.75                                                        |
| temperature [K]                                      | 123                                                           |
| wavelength [Å]                                       | 0.71073                                                       |
| crystal system                                       | triclinic                                                     |
| space group                                          | P -1                                                          |
| <i>a</i> [Å]                                         | 8.8912(5)                                                     |
| <i>b</i> [Å]                                         | 9.5438(6)                                                     |
| <i>c</i> [Å]                                         | 10.6502(7)                                                    |
| $\alpha$ [°]                                         | 93.787(5)                                                     |
| $\beta$ [°]                                          | 91.373(5)                                                     |
| $\gamma$ [°]                                         | 112.630(6)                                                    |
| Volume [Å <sup>3</sup> ]                             | 831.13(10)                                                    |
| <i>Z</i>                                             | 1                                                             |
| Density (calculated) [g/cm <sup>3</sup> ]            | 1.256                                                         |
| Absorption coefficient [mm <sup>-1</sup> ]           | 0.078                                                         |
| <i>F</i> (000)                                       | 332.0                                                         |
| $\theta$ [°]                                         | 2.663 to 26.366                                               |
| Reflections collected                                | 8591                                                          |
| Independent reflections                              | 3388 [ <i>R</i> <sub>(int)</sub> = 0.0199]                    |
| Data / restraints / parameters                       | 3388 / 0 / 222                                                |
| Goodness-of-fit on <i>F</i> <sup>2</sup>             | 0.999                                                         |
| <i>R</i> 1 <sup>a</sup> [ <i>I</i> > 2σ( <i>I</i> )] | 0.0414                                                        |
| <i>wR</i> 2 <sup>b</sup> (all data)                  | 0.1030                                                        |
| Largest diff. peak and hole [e.Å <sup>-3</sup> ]     | 0.20 and -0.24                                                |

a:  $R1 = (\sum ||F_o| - |F_c||) / (\sum |F_o|)$ . b:  $wR2 = [\sum w(F_o^2 - F_c^2)^2 / \sum wF_o^4]^{1/2}$ , where  $w = 1 / [\sigma^2(F_o^2) + (0.0430(F_o^2 + 2F_c^2)/3)^2 + 0.1380(F_o^2 + 2F_c^2)/3]$

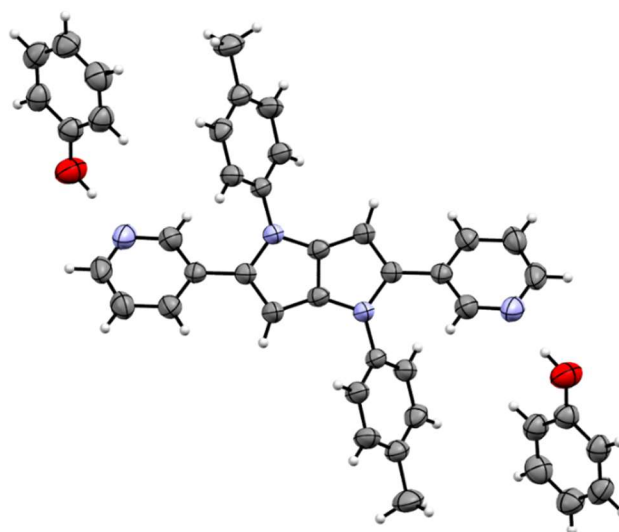

**Fig. S4** Crystal structure of **1•a** (298 K). Ellipsoids are plotted at the 50% probability level.

**Table S4** Crystallographic data for **1•a** (298 K).

| Compound                                             | <b>1•a</b>                                                    |
|------------------------------------------------------|---------------------------------------------------------------|
| CCDC No.                                             | 1910441                                                       |
| empirical formula                                    | C <sub>42</sub> H <sub>36</sub> N <sub>4</sub> O <sub>2</sub> |
| formula weight                                       | 628.75                                                        |
| temperature [K]                                      | 298                                                           |
| wavelength [Å]                                       | 0.71073                                                       |
| crystal system                                       | triclinic                                                     |
| space group                                          | P -1                                                          |
| <i>a</i> [Å]                                         | 8.9338(7)                                                     |
| <i>b</i> [Å]                                         | 9.6930(8)                                                     |
| <i>c</i> [Å]                                         | 10.7136(8)                                                    |
| $\alpha$ [°]                                         | 93.146(6)                                                     |
| $\beta$ [°]                                          | 90.933(6)                                                     |
| $\gamma$ [°]                                         | 112.034(7)                                                    |
| Volume [Å <sup>3</sup> ]                             | 858.01(12)                                                    |
| <i>Z</i>                                             | 1                                                             |
| Density (calculated) [g/cm <sup>3</sup> ]            | 1.217                                                         |
| Absorption coefficient [mm <sup>-1</sup> ]           | 0.076                                                         |
| <i>F</i> (000)                                       | 332.0                                                         |
| $\theta$ [°]                                         | 2.647 to 26.367                                               |
| Reflections collected                                | 7709                                                          |
| Independent reflections                              | 3502 [ <i>R</i> <sub>(int)</sub> = 0.0331]                    |
| Data / restraints / parameters                       | 3502 / 0 / 222                                                |
| Goodness-of-fit on <i>F</i> <sup>2</sup>             | 1.006                                                         |
| <i>R</i> 1 <sup>a</sup> [ <i>I</i> > 2σ( <i>I</i> )] | 0.0510                                                        |
| <i>wR</i> 2 <sup>b</sup> (all data)                  | 0.1420                                                        |
| Largest diff. peak and hole [e.Å <sup>-3</sup> ]     | 0.15 and -0.17                                                |

a:  $R1 = (\sum ||F_o| - |F_c||) / (\sum |F_o|)$ . b:  $wR2 = [\sum w(F_o^2 - F_c^2)^2 / \sum wF_o^4]^{1/2}$ , where  $w = 1 / [\sigma^2(F_o^2) + (0.0470(F_o^2 + 2F_c^2) / 3)^2]$

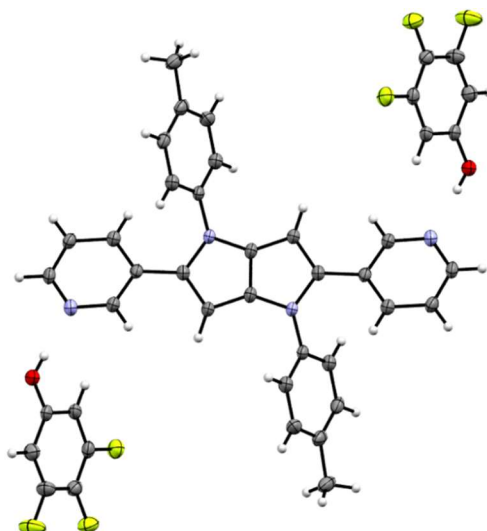

**Fig. S5** Crystal structure of **1•b** (123 K). Ellipsoids are plotted at the 50% probability level.

**Table S5** Crystallographic data for **1•b** (123 K).

| Compound                                             | <b>1•b</b>                                                                   |
|------------------------------------------------------|------------------------------------------------------------------------------|
| CCDC No.                                             | 1910442                                                                      |
| empirical formula                                    | C <sub>42</sub> H <sub>30</sub> F <sub>6</sub> N <sub>4</sub> O <sub>2</sub> |
| formula weight                                       | 736.70                                                                       |
| temperature [K]                                      | 123                                                                          |
| wavelength [Å]                                       | 0.71073                                                                      |
| crystal system                                       | triclinic                                                                    |
| space group                                          | P -1                                                                         |
| <i>a</i> [Å]                                         | 7.2393(5)                                                                    |
| <i>b</i> [Å]                                         | 10.9716(9)                                                                   |
| <i>c</i> [Å]                                         | 11.9913(11)                                                                  |
| $\alpha$ [°]                                         | 70.492(8)                                                                    |
| $\beta$ [°]                                          | 72.988(7)                                                                    |
| $\gamma$ [°]                                         | 88.835(6)                                                                    |
| Volume [Å <sup>3</sup> ]                             | 855.30(13)                                                                   |
| <i>Z</i>                                             | 1                                                                            |
| Density (calculated) [g/cm <sup>3</sup> ]            | 1.430                                                                        |
| Absorption coefficient [mm <sup>-1</sup> ]           | 0.112                                                                        |
| <i>F</i> (000)                                       | 380.0                                                                        |
| $\theta$ [°]                                         | 2.953 to 26.37                                                               |
| Reflections collected                                | 11526                                                                        |
| Independent reflections                              | 3485 [ <i>R</i> <sub>(int)</sub> = 0.0357]                                   |
| Data / restraints / parameters                       | 3485 / 0 / 246                                                               |
| Goodness-of-fit on <i>F</i> <sup>2</sup>             | 1.046                                                                        |
| <i>R</i> 1 <sup>a</sup> [ <i>I</i> > 2σ( <i>I</i> )] | 0.0546                                                                       |
| <i>wR</i> 2 <sup>b</sup> (all data)                  | 0.1603                                                                       |
| Largest diff. peak and hole [e.Å <sup>-3</sup> ]     | 0.36 and -0.39                                                               |

a:  $R1 = (\sum ||F_o| - |F_c||) / (\sum |F_o|)$ . b:  $wR2 = [\sum w(F_o^2 - F_c^2)^2 / \sum wF_o^4]^{1/2}$ , where  $w = 1 / [\sigma^2(F_o^2) + (0.0970(F_o^2 + 2F_c^2)/3)^2 + 0.3200(F_o^2 + 2F_c^2)/3]$

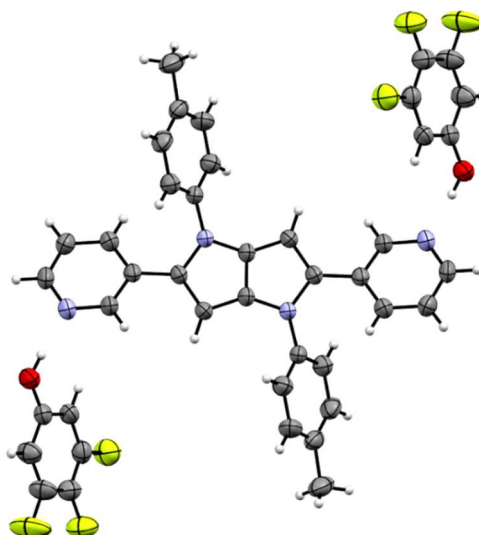

**Fig. S6** Crystal structure of **1•b** (298 K). Ellipsoids are plotted at the 50% probability level.

**Table S6** Crystallographic data for **1•b** (298 K).

| Compound                                             | <b>1•b</b>                                                                   |
|------------------------------------------------------|------------------------------------------------------------------------------|
| CCDC No.                                             | 1910443                                                                      |
| empirical formula                                    | C <sub>42</sub> H <sub>30</sub> F <sub>6</sub> N <sub>4</sub> O <sub>2</sub> |
| formula weight                                       | 736.70                                                                       |
| temperature [K]                                      | 298                                                                          |
| wavelength [Å]                                       | 0.71073                                                                      |
| crystal system                                       | triclinic                                                                    |
| space group                                          | P -1                                                                         |
| <i>a</i> [Å]                                         | 7.3705(6)                                                                    |
| <i>b</i> [Å]                                         | 11.0005(12)                                                                  |
| <i>c</i> [Å]                                         | 12.0029(13)                                                                  |
| $\alpha$ [°]                                         | 109.130(10)                                                                  |
| $\beta$ [°]                                          | 106.773(8)                                                                   |
| $\gamma$ [°]                                         | 90.454(8)                                                                    |
| Volume [Å <sup>3</sup> ]                             | 874.66(16)                                                                   |
| <i>Z</i>                                             | 1                                                                            |
| Density (calculated) [g/cm <sup>3</sup> ]            | 1.399                                                                        |
| Absorption coefficient [mm <sup>-1</sup> ]           | 0.109                                                                        |
| <i>F</i> (000)                                       | 380.0                                                                        |
| $\theta$ [°]                                         | 2.905 to 26.373                                                              |
| Reflections collected                                | 7431                                                                         |
| Independent reflections                              | 3571 [ <i>R</i> <sub>(int)</sub> = 0.0366]                                   |
| Data / restraints / parameters                       | 3571 / 0 / 249                                                               |
| Goodness-of-fit on <i>F</i> <sup>2</sup>             | 1.067                                                                        |
| <i>R</i> 1 <sup>a</sup> [ <i>I</i> > 2σ( <i>I</i> )] | 0.0578                                                                       |
| <i>wR</i> 2 <sup>b</sup> (all data)                  | 0.1729                                                                       |
| Largest diff. peak and hole [e.Å <sup>-3</sup> ]     | 0.23 and -0.26                                                               |

a:  $R1 = (\sum ||F_o| - |F_c||) / (\sum |F_o|)$ . b:  $wR2 = [\sum w(F_o^2 - F_c^2)^2 / \sum wF_o^4]^{1/2}$ , where  $w = 1 / [\sigma^2(F_o^2) + (0.0868(F_o^2 + 2F_c^2)/3)^2 + 0.1906(F_o^2 + 2F_c^2)/3]$



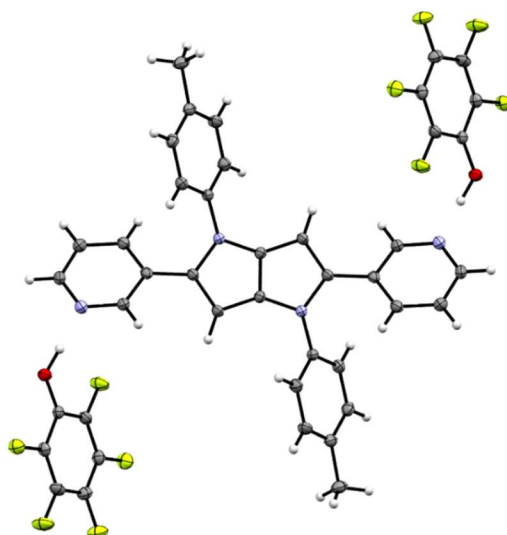

**Fig. S7** Crystal structure of **1•c** (123 K). Ellipsoids are plotted at the 50% probability level.

**Table S7** Crystallographic data for **1•c** (123 K).

| Compound                                             | <b>1•c</b>                                                                    |
|------------------------------------------------------|-------------------------------------------------------------------------------|
| CCDC No.                                             | 1910444                                                                       |
| empirical formula                                    | C <sub>42</sub> H <sub>26</sub> F <sub>10</sub> N <sub>4</sub> O <sub>2</sub> |
| formula weight                                       | 808.67                                                                        |
| temperature [K]                                      | 123                                                                           |
| wavelength [Å]                                       | 0.71073                                                                       |
| crystal system                                       | triclinic                                                                     |
| space group                                          | P -1                                                                          |
| <i>a</i> [Å]                                         | 7.1878(5)                                                                     |
| <i>b</i> [Å]                                         | 11.3276(9)                                                                    |
| <i>c</i> [Å]                                         | 12.0753(8)                                                                    |
| $\alpha$ [°]                                         | 109.633(7)                                                                    |
| $\beta$ [°]                                          | 106.637(6)                                                                    |
| $\gamma$ [°]                                         | 90.162(6)                                                                     |
| Volume [Å <sup>3</sup> ]                             | 881.90(12)                                                                    |
| <i>Z</i>                                             | 1                                                                             |
| Density (calculated) [g/cm <sup>3</sup> ]            | 1.523                                                                         |
| Absorption coefficient [mm <sup>-1</sup> ]           | 0.131                                                                         |
| <i>F</i> (000)                                       | 412.0                                                                         |
| $\theta$ [°]                                         | 2.976 to 26.37                                                                |
| Reflections collected                                | 6129                                                                          |
| Independent reflections                              | 3562 [ <i>R</i> <sub>(int)</sub> = 0.0141]                                    |
| Data / restraints / parameters                       | 3562 / 0 / 267                                                                |
| Goodness-of-fit on <i>F</i> <sup>2</sup>             | 0.987                                                                         |
| <i>R</i> 1 <sup>a</sup> [ <i>I</i> > 2σ( <i>I</i> )] | 0.0346                                                                        |
| <i>wR</i> 2 <sup>b</sup> (all data)                  | 0.1006                                                                        |
| Largest diff. peak and hole [e.Å <sup>-3</sup> ]     | 0.27 and -0.23                                                                |

a:  $R1 = (\sum ||F_o| - |F_c||) / (\sum |F_o|)$ . b:  $wR2 = [\sum w(F_o^2 - F_c^2)^2 / \sum wF_o^4]^{1/2}$ , where  $w = 1 / [\sigma^2(F_o^2) + (0.0550(F_o^2 + 2F_c^2)/3)^2 + 0.3710(F_o^2 + 2F_c^2)/3]$

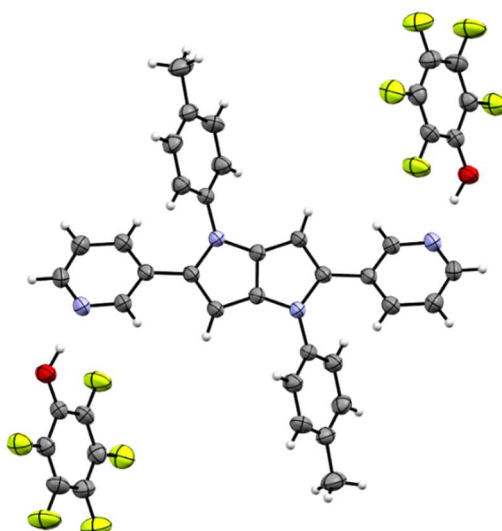

**Fig. S8** Crystal structure of **1•c** (298 K). Ellipsoids are plotted at the 50% probability level.

**Table S8** Crystallographic data for **1•c** (298 K).

| Compound                                             | <b>1•c</b>                                                                    |
|------------------------------------------------------|-------------------------------------------------------------------------------|
| CCDC No.                                             | 1910445                                                                       |
| empirical formula                                    | C <sub>42</sub> H <sub>26</sub> F <sub>10</sub> N <sub>4</sub> O <sub>2</sub> |
| formula weight                                       | 808.67                                                                        |
| temperature [K]                                      | 298                                                                           |
| wavelength [Å]                                       | 0.71073                                                                       |
| crystal system                                       | triclinic                                                                     |
| space group                                          | P -1                                                                          |
| <i>a</i> [Å]                                         | 7.3417(4)                                                                     |
| <i>b</i> [Å]                                         | 11.3589(7)                                                                    |
| <i>c</i> [Å]                                         | 12.1244(7)                                                                    |
| $\alpha$ [°]                                         | 109.165(5)                                                                    |
| $\beta$ [°]                                          | 106.484(5)                                                                    |
| $\gamma$ [°]                                         | 91.817(5)                                                                     |
| Volume [Å <sup>3</sup> ]                             | 907.06(10)                                                                    |
| <i>Z</i>                                             | 1                                                                             |
| Density (calculated) [g/cm <sup>3</sup> ]            | 1.480                                                                         |
| Absorption coefficient [mm <sup>-1</sup> ]           | 0.128                                                                         |
| <i>F</i> (000)                                       | 412.0                                                                         |
| $\theta$ [°]                                         | 2.921 to 26.372                                                               |
| Reflections collected                                | 8137                                                                          |
| Independent reflections                              | 3695 [ <i>R</i> <sub>(int)</sub> = 0.0139]                                    |
| Data / restraints / parameters                       | 3695 / 0 / 267                                                                |
| Goodness-of-fit on <i>F</i> <sup>2</sup>             | 1.019                                                                         |
| <i>R</i> 1 <sup>a</sup> [ <i>I</i> > 2σ( <i>I</i> )] | 0.0387                                                                        |
| <i>wR</i> 2 <sup>b</sup> (all data)                  | 0.116                                                                         |
| Largest diff. peak and hole [e.Å <sup>-3</sup> ]     | 0.17 and -0.18                                                                |

a:  $R1 = (\sum ||F_o| - |F_c||) / (\sum |F_o|)$ . b:  $wR2 = [\sum w(F_o^2 - F_c^2)^2 / \sum wF_o^4]^{1/2}$ , where  $w = 1 / [\sigma^2(F_o^2) + (0.0530(F_o^2 + 2F_c^2)/3)^2 + 0.2440(F_o^2 + 2F_c^2)/3]$

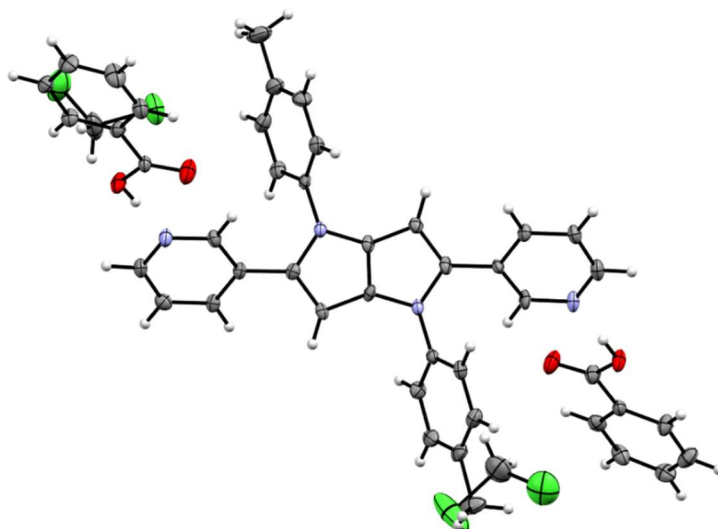

**Fig. S9** Crystal structure of **1·d**·CH<sub>2</sub>Cl<sub>2</sub> (123 K). Ellipsoids are plotted at the 50% probability level.

**Table S9** Crystallographic data for **1·d**·CH<sub>2</sub>Cl<sub>2</sub> (123 K).

| Compound                                             | <b>1·d</b> ·CH <sub>2</sub> Cl <sub>2</sub>                                   |
|------------------------------------------------------|-------------------------------------------------------------------------------|
| CCDC No.                                             | 1910446                                                                       |
| empirical formula                                    | C <sub>46</sub> H <sub>40</sub> Cl <sub>4</sub> N <sub>4</sub> O <sub>4</sub> |
| formula weight                                       | 854.62                                                                        |
| temperature [K]                                      | 123                                                                           |
| wavelength [Å]                                       | 0.71073                                                                       |
| crystal system                                       | orthorhombic                                                                  |
| space group                                          | Pna2 <sub>1</sub>                                                             |
| <i>a</i> [Å]                                         | 24.062(2)                                                                     |
| <i>b</i> [Å]                                         | 6.2048(7)                                                                     |
| <i>c</i> [Å]                                         | 27.631(3)                                                                     |
| $\alpha$ [°]                                         | 90                                                                            |
| $\beta$ [°]                                          | 90                                                                            |
| $\gamma$ [°]                                         | 90                                                                            |
| Volume [Å <sup>3</sup> ]                             | 4125.3(7)                                                                     |
| <i>Z</i>                                             | 4                                                                             |
| Density (calculated) [g/cm <sup>3</sup> ]            | 1.376                                                                         |
| Absorption coefficient [mm <sup>-1</sup> ]           | 0.337                                                                         |
| <i>F</i> (000)                                       | 1776.0                                                                        |
| $\theta$ [°]                                         | 2.785 to 26.372                                                               |
| Reflections collected                                | 13766                                                                         |
| Independent reflections                              | 7325 [ <i>R</i> <sub>(int)</sub> = 0.0424]                                    |
| Data / restraints / parameters                       | 7325 / 1 / 530                                                                |
| Goodness-of-fit on <i>F</i> <sup>2</sup>             | 1.139                                                                         |
| <i>R</i> 1 <sup>a</sup> [ <i>I</i> > 2σ( <i>I</i> )] | 0.0732                                                                        |
| <i>wR</i> 2 <sup>b</sup> (all data)                  | 0.2046                                                                        |
| Largest diff. peak and hole [e.Å <sup>-3</sup> ]     | 0.50 and -0.64                                                                |

a:  $R1 = (\sum ||F_o| - |F_c||) / (\sum |F_o|)$ . b:  $wR2 = [\sum w(F_o^2 - F_c^2)^2 / \sum wF_o^4]^{1/2}$ , where  $w = 1 / [\sigma^2(F_o^2) + (0.1000(F_o^2 + 2F_c^2)/3)^2 + 4.8600(F_o^2 + 2F_c^2)/3]$

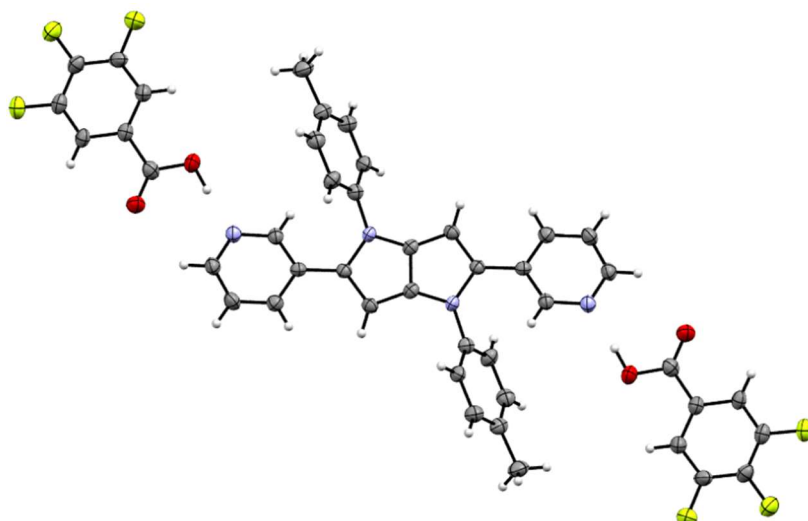

**Fig. S10** Crystal structure of **1•e** (123 K). Ellipsoids are plotted at the 50% probability level.

**Table S10** Crystallographic data for **1•e** (123 K).

| Compound                                             | <b>1•e</b>                                                                   |
|------------------------------------------------------|------------------------------------------------------------------------------|
| CCDC No.                                             | 1910447                                                                      |
| empirical formula                                    | C <sub>44</sub> H <sub>30</sub> F <sub>6</sub> N <sub>4</sub> O <sub>4</sub> |
| formula weight                                       | 792.72                                                                       |
| temperature [K]                                      | 123                                                                          |
| wavelength [Å]                                       | 0.71073                                                                      |
| crystal system                                       | monoclinic                                                                   |
| space group                                          | P2 <sub>1</sub> /c                                                           |
| <i>a</i> [Å]                                         | 5.9103(5)                                                                    |
| <i>b</i> [Å]                                         | 18.358(2)                                                                    |
| <i>c</i> [Å]                                         | 17.0558(19)                                                                  |
| $\alpha$ [°]                                         | 90                                                                           |
| $\beta$ [°]                                          | 92.591(9)                                                                    |
| $\gamma$ [°]                                         | 90                                                                           |
| Volume [Å <sup>3</sup> ]                             | 1848.7(3)                                                                    |
| <i>Z</i>                                             | 2                                                                            |
| Density (calculated) [g/cm <sup>3</sup> ]            | 1.424                                                                        |
| Absorption coefficient [mm <sup>-1</sup> ]           | 0.113                                                                        |
| <i>F</i> (000)                                       | 816.0                                                                        |
| $\theta$ [°]                                         | 2.52 to 26.371                                                               |
| Reflections collected                                | 11892                                                                        |
| Independent reflections                              | 3775 [ <i>R</i> <sub>(int)</sub> = 0.1341]                                   |
| Data / restraints / parameters                       | 3775 / 0 / 267                                                               |
| Goodness-of-fit on <i>F</i> <sup>2</sup>             | 1.007                                                                        |
| <i>R</i> 1 <sup>a</sup> [ <i>I</i> > 2σ( <i>I</i> )] | 0.0732                                                                       |
| <i>wR</i> 2 <sup>b</sup> (all data)                  | 0.2228                                                                       |
| Largest diff. peak and hole [e.Å <sup>-3</sup> ]     | 0.36 and -0.34                                                               |

a:  $R1 = (\sum ||F_o| - |F_c||) / (\sum |F_o|)$ . b:  $wR2 = [\sum w(F_o^2 - F_c^2)^2 / \sum wF_o^4]^{1/2}$ , where  $w = 1 / [\sigma^2(F_o^2) + (0.0640(F_o^2 + 2F_c^2) / 3)^2]$

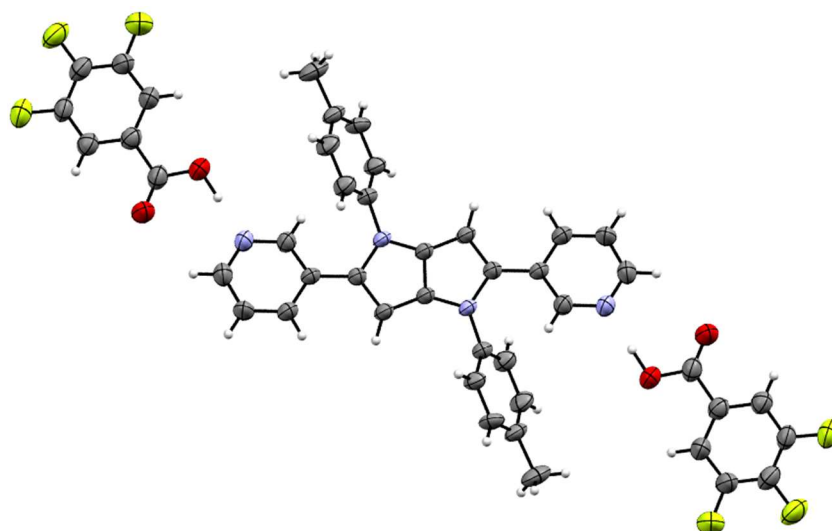

**Fig. S11** Crystal structure of **1•e** (298 K). Ellipsoids are plotted at the 50% probability level.

**Table S11** Crystallographic data for **1•e** (298 K).

| Compound                                             | <b>1•e</b>                                                                   |
|------------------------------------------------------|------------------------------------------------------------------------------|
| CCDC No.                                             | 1910448                                                                      |
| empirical formula                                    | C <sub>44</sub> H <sub>30</sub> F <sub>6</sub> N <sub>4</sub> O <sub>4</sub> |
| formula weight                                       | 792.72                                                                       |
| temperature [K]                                      | 298                                                                          |
| wavelength [Å]                                       | 0.71073                                                                      |
| crystal system                                       | monoclinic                                                                   |
| space group                                          | P2 <sub>1</sub> /c                                                           |
| <i>a</i> [Å]                                         | 5.8781(5)                                                                    |
| <i>b</i> [Å]                                         | 18.3134(19)                                                                  |
| <i>c</i> [Å]                                         | 17.3997(18)                                                                  |
| $\alpha$ [°]                                         | 90                                                                           |
| $\beta$ [°]                                          | 93.672(9)                                                                    |
| $\gamma$ [°]                                         | 90                                                                           |
| Volume [Å <sup>3</sup> ]                             | 1869.2(3)                                                                    |
| <i>Z</i>                                             | 2                                                                            |
| Density (calculated) [g/cm <sup>3</sup> ]            | 1.408                                                                        |
| Absorption coefficient [mm <sup>-1</sup> ]           | 0.113                                                                        |
| <i>F</i> (000)                                       | 816.0                                                                        |
| $\theta$ [°]                                         | 2.515 to 26.37                                                               |
| Reflections collected                                | 12241                                                                        |
| Independent reflections                              | 3822 [ <i>R</i> <sub>(int)</sub> = 0.1341]                                   |
| Data / restraints / parameters                       | 3822 / 0 / 267                                                               |
| Goodness-of-fit on <i>F</i> <sup>2</sup>             | 0.992                                                                        |
| <i>R</i> 1 <sup>a</sup> [ <i>I</i> > 2σ( <i>I</i> )] | 0.0619                                                                       |
| <i>wR</i> 2 <sup>b</sup> (all data)                  | 0.1645                                                                       |
| Largest diff. peak and hole [e.Å <sup>-3</sup> ]     | 0.17 and -0.25                                                               |

a:  $R1 = (\sum ||F_o| - |F_c||) / (\sum |F_o|)$ . b:  $wR2 = [\sum w(F_o^2 - F_c^2)^2 / \sum wF_o^4]^{1/2}$ , where  $w = 1 / [\sigma^2(F_o^2) + (0.0350(F_o^2 + 2F_c^2) / 3)^2]$

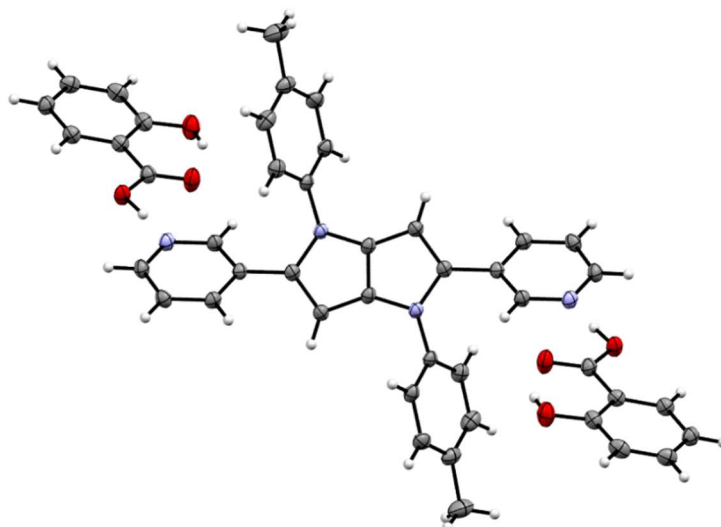

**Fig. S12** Crystal structure of **1•f** (123 K). Ellipsoids are plotted at the 50% probability level.

**Table S12** Crystallographic data for **1•f** (123 K).

| Compound                                             | <b>1•f</b>                                                    |
|------------------------------------------------------|---------------------------------------------------------------|
| CCDC No.                                             | 1910450                                                       |
| empirical formula                                    | C <sub>44</sub> H <sub>36</sub> N <sub>4</sub> O <sub>6</sub> |
| formula weight                                       | 716.77                                                        |
| temperature [K]                                      | 123                                                           |
| wavelength [Å]                                       | 0.71073                                                       |
| crystal system                                       | triclinic                                                     |
| space group                                          | P -1                                                          |
| <i>a</i> [Å]                                         | 6.5494(3)                                                     |
| <i>b</i> [Å]                                         | 12.4521(7)                                                    |
| <i>c</i> [Å]                                         | 12.9443(8)                                                    |
| $\alpha$ [°]                                         | 112.739(6)                                                    |
| $\beta$ [°]                                          | 101.751(5)                                                    |
| $\gamma$ [°]                                         | 102.668(4)                                                    |
| Volume [Å <sup>3</sup> ]                             | 899.78(10)                                                    |
| <i>Z</i>                                             | 1                                                             |
| Density (calculated) [g/cm <sup>3</sup> ]            | 1.323                                                         |
| Absorption coefficient [mm <sup>-1</sup> ]           | 0.089                                                         |
| <i>F</i> (000)                                       | 376.0                                                         |
| $\theta$ [°]                                         | 3.136 to 26.37                                                |
| Reflections collected                                | 7850                                                          |
| Independent reflections                              | 3668 [ <i>R</i> <sub>(int)</sub> = 0.0252]                    |
| Data / restraints / parameters                       | 3668 / 0 / 250                                                |
| Goodness-of-fit on <i>F</i> <sup>2</sup>             | 1.023                                                         |
| <i>R</i> 1 <sup>a</sup> [ <i>I</i> > 2σ( <i>I</i> )] | 0.0404                                                        |
| <i>wR</i> 2 <sup>b</sup> (all data)                  | 0.1186                                                        |
| Largest diff. peak and hole [e.Å <sup>-3</sup> ]     | 0.28 and -0.21                                                |

a:  $R1 = (\sum ||F_o| - |F_c||) / (\sum |F_o|)$ . b:  $wR2 = [\sum w(F_o^2 - F_c^2)^2 / \sum wF_o^4]^{1/2}$ , where  $w = 1 / [\sigma^2(F_o^2) + (0.0590(F_o^2 + 2F_c^2)/3)^2 + 0.3020(F_o^2 + 2F_c^2)/3]$

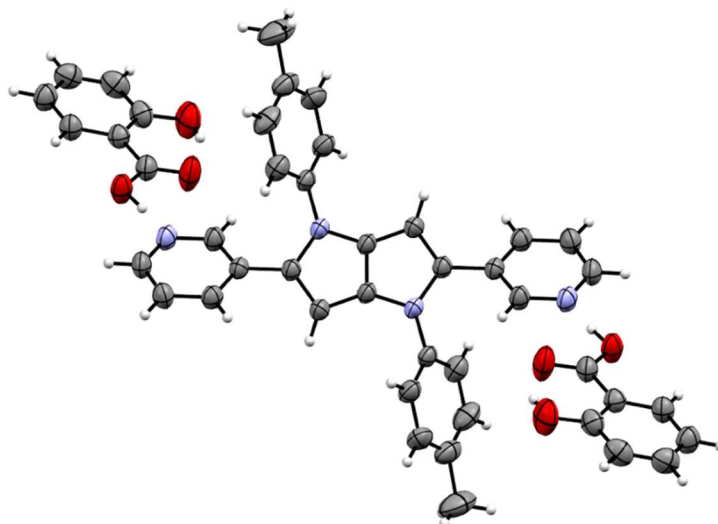

**Fig. S13** Crystal structure of **1•f** (298 K). Ellipsoids are plotted at the 50% probability level.

**Table S13** Crystallographic data for **1•f** (298 K).

| Compound                                             | <b>1•f</b>                                                    |
|------------------------------------------------------|---------------------------------------------------------------|
| CCDC No.                                             | 1910449                                                       |
| empirical formula                                    | C <sub>44</sub> H <sub>36</sub> N <sub>4</sub> O <sub>6</sub> |
| formula weight                                       | 716.77                                                        |
| temperature [K]                                      | 298                                                           |
| wavelength [Å]                                       | 0.71073                                                       |
| crystal system                                       | triclinic                                                     |
| space group                                          | P -1                                                          |
| <i>a</i> [Å]                                         | 6.5951(7)                                                     |
| <i>b</i> [Å]                                         | 12.5932(13)                                                   |
| <i>c</i> [Å]                                         | 13.1549(16)                                                   |
| $\alpha$ [°]                                         | 116.795(11)                                                   |
| $\beta$ [°]                                          | 95.657(9)                                                     |
| $\gamma$ [°]                                         | 102.311(9)                                                    |
| Volume [Å <sup>3</sup> ]                             | 928.8(2)                                                      |
| <i>Z</i>                                             | 1                                                             |
| Density (calculated) [g/cm <sup>3</sup> ]            | 1.281                                                         |
| Absorption coefficient [mm <sup>-1</sup> ]           | 0.086                                                         |
| <i>F</i> (000)                                       | 376.0                                                         |
| $\theta$ [°]                                         | 3.117 to 26.371                                               |
| Reflections collected                                | 7632                                                          |
| Independent reflections                              | 3789 [ <i>R</i> <sub>(int)</sub> = 0.0200]                    |
| Data / restraints / parameters                       | 3789 / 0 / 250                                                |
| Goodness-of-fit on <i>F</i> <sup>2</sup>             | 1.010                                                         |
| <i>R</i> 1 <sup>a</sup> [ <i>I</i> > 2σ( <i>I</i> )] | 0.0424                                                        |
| <i>wR</i> 2 <sup>b</sup> (all data)                  | 0.1346                                                        |
| Largest diff. peak and hole [e.Å <sup>-3</sup> ]     | 0.15 and -0.16                                                |

a:  $R1 = (\sum ||F_o| - |F_c||) / (\sum |F_o|)$ . b:  $wR2 = [\sum w(F_o^2 - F_c^2)^2 / \sum wF_o^4]^{1/2}$ , where  $w = 1 / [\sigma^2(F_o^2) + (0.0710(F_o^2 + 2F_c^2)/3)^2 + 0.1390(F_o^2 + 2F_c^2)/3]$

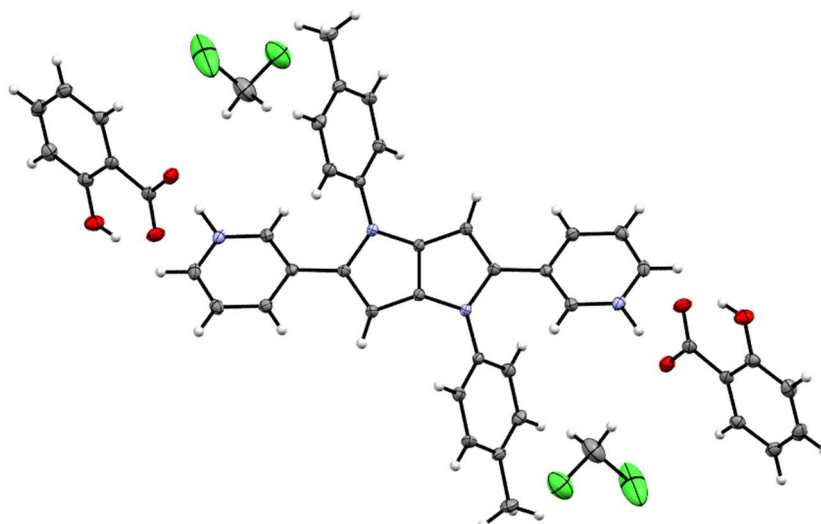

**Fig. S14** Crystal structure of  $1\cdot f\supset CH_2Cl_2$  (123 K). Ellipsoids are plotted at the 50% probability level.

**Table S14** Crystallographic data for  $1\cdot f\supset CH_2Cl_2$  (123 K).

| Compound                                         | $1\cdot f\supset CH_2Cl_2$    |
|--------------------------------------------------|-------------------------------|
| CCDC No.                                         | 1910452                       |
| empirical formula                                | $C_{46}H_{40}Cl_4N_4O_6$      |
| formula weight                                   | 886.62                        |
| temperature [K]                                  | 123                           |
| wavelength [Å]                                   | 0.71073                       |
| crystal system                                   | triclinic                     |
| space group                                      | P -1                          |
| $a$ [Å]                                          | 9.5466(5)                     |
| $b$ [Å]                                          | 10.9106(5)                    |
| $c$ [Å]                                          | 11.4827(5)                    |
| $\alpha$ [°]                                     | 75.419(4)                     |
| $\beta$ [°]                                      | 67.639(5)                     |
| $\gamma$ [°]                                     | 84.290(4)                     |
| Volume [Å <sup>3</sup> ]                         | 1070.46(10)                   |
| $Z$                                              | 1                             |
| Density (calculated) [g/cm <sup>3</sup> ]        | 1.375                         |
| Absorption coefficient [mm <sup>-1</sup> ]       | 0.331                         |
| $F(000)$                                         | 460.0                         |
| $\theta$ [°]                                     | 2.787 to 26.372               |
| Reflections collected                            | 9253                          |
| Independent reflections                          | 4372 [ $R_{(int)} = 0.0132$ ] |
| Data / restraints / parameters                   | 4372 / 0 / 277                |
| Goodness-of-fit on $F^2$                         | 1.048                         |
| $R1^a$ [ $I > 2\sigma(I)$ ]                      | 0.0406                        |
| $wR2^b$ (all data)                               | 0.1088                        |
| Largest diff. peak and hole [e.Å <sup>-3</sup> ] | 0.46 and -0.66                |

a:  $R1 = (\sum ||F_o| - |F_c||) / (\sum |F_o|)$ . b:  $wR2 = [\sum w(F_o^2 - F_c^2)^2 / \sum wF_o^4]^{1/2}$ , where  $w = 1 / [\sigma^2(F_o^2) + (0.0510(F_o^2 + 2F_c^2)/3)^2 + 0.7050(F_o^2 + 2F_c^2)/3]$



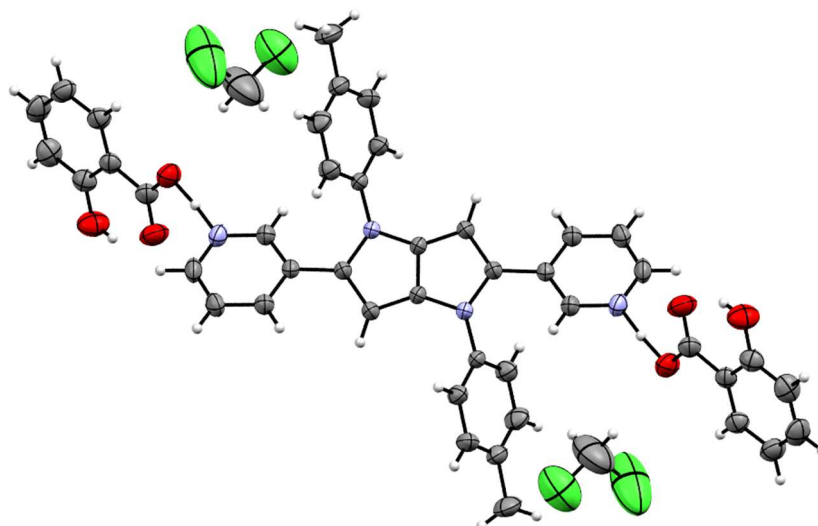

**Fig. S15** Crystal structure of **1•f**·CH<sub>2</sub>Cl<sub>2</sub> (298 K). Ellipsoids are plotted at the 50% probability level.

**Table S15** Crystallographic data for **1•f**·CH<sub>2</sub>Cl<sub>2</sub> (298 K).

| Compound                                             | <b>1•f</b> ·CH <sub>2</sub> Cl <sub>2</sub>                                   |
|------------------------------------------------------|-------------------------------------------------------------------------------|
| CCDC No.                                             | 1910451                                                                       |
| empirical formula                                    | C <sub>46</sub> H <sub>40</sub> Cl <sub>4</sub> N <sub>4</sub> O <sub>6</sub> |
| formula weight                                       | 886.62                                                                        |
| temperature [K]                                      | 298                                                                           |
| wavelength [Å]                                       | 0.71073                                                                       |
| crystal system                                       | triclinic                                                                     |
| space group                                          | P -1                                                                          |
| <i>a</i> [Å]                                         | 9.5614(7)                                                                     |
| <i>b</i> [Å]                                         | 10.9763(9)                                                                    |
| <i>c</i> [Å]                                         | 11.7461(7)                                                                    |
| $\alpha$ [°]                                         | 75.295(6)                                                                     |
| $\beta$ [°]                                          | 67.456(6)                                                                     |
| $\gamma$ [°]                                         | 84.613(7)                                                                     |
| Volume [Å <sup>3</sup> ]                             | 1101.24(15)                                                                   |
| <i>Z</i>                                             | 1                                                                             |
| Density (calculated) [g/cm <sup>3</sup> ]            | 1.337                                                                         |
| Absorption coefficient [mm <sup>-1</sup> ]           | 0.321                                                                         |
| <i>F</i> (000)                                       | 460.0                                                                         |
| $\theta$ [°]                                         | 2.772 to 26.372                                                               |
| Reflections collected                                | 9736                                                                          |
| Independent reflections                              | 4501 [ <i>R</i> <sub>(int)</sub> = 0.0166]                                    |
| Data / restraints / parameters                       | 4501 / 0 / 277                                                                |
| Goodness-of-fit on <i>F</i> <sup>2</sup>             | 1.050                                                                         |
| <i>R</i> 1 <sup>a</sup> [ <i>I</i> > 2σ( <i>I</i> )] | 0.0588                                                                        |
| <i>wR</i> 2 <sup>b</sup> (all data)                  | 0.1881                                                                        |
| Largest diff. peak and hole [e.Å <sup>-3</sup> ]     | 0.52 and -0.62                                                                |

a:  $R1 = (\sum ||F_o| - |F_c||) / (\sum |F_o|)$ . b:  $wR2 = [\sum w(F_o^2 - F_c^2)^2 / \sum wF_o^4]^{1/2}$ , where  $w = 1 / [\sigma^2(F_o^2) + (0.0980(F_o^2 + 2F_c^2)/3)^2 + 0.5430(F_o^2 + 2F_c^2)/3]$

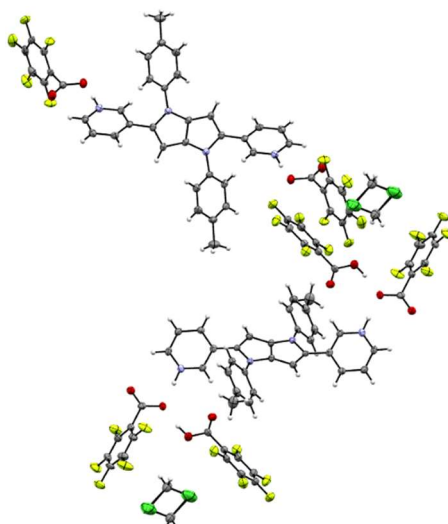

**Fig. S16** Crystal structure of **1•g**⊃CH<sub>2</sub>Cl<sub>2</sub> (123 K). Ellipsoids are plotted at the 50% probability level.

**Table S16** Crystallographic data for **1•g**⊃CH<sub>2</sub>Cl<sub>2</sub> (123 K).

| Compound                                             | <b>1•g</b> ⊃CH <sub>2</sub> Cl <sub>2</sub>                                                     |
|------------------------------------------------------|-------------------------------------------------------------------------------------------------|
| CCDC No.                                             | 1910453                                                                                         |
| empirical formula                                    | C <sub>103</sub> H <sub>56</sub> Cl <sub>2</sub> F <sub>30</sub> N <sub>8</sub> O <sub>12</sub> |
| formula weight                                       | 2238.45                                                                                         |
| temperature [K]                                      | 123                                                                                             |
| wavelength [Å]                                       | 0.71073                                                                                         |
| crystal system                                       | triclinic                                                                                       |
| space group                                          | P -1                                                                                            |
| <i>a</i> [Å]                                         | 13.6508(15)                                                                                     |
| <i>b</i> [Å]                                         | 13.6780(10)                                                                                     |
| <i>c</i> [Å]                                         | 13.7140(13)                                                                                     |
| $\alpha$ [°]                                         | 116.795(11)                                                                                     |
| $\beta$ [°]                                          | 74.923(9)                                                                                       |
| $\gamma$ [°]                                         | 71.683(8)                                                                                       |
| Volume [Å <sup>3</sup> ]                             | 2336.1(4)                                                                                       |
| <i>Z</i>                                             | 1                                                                                               |
| Density (calculated) [g/cm <sup>3</sup> ]            | 1.591                                                                                           |
| Absorption coefficient [mm <sup>-1</sup> ]           | 0.200                                                                                           |
| <i>F</i> (000)                                       | 1130.0                                                                                          |
| $\theta$ [°]                                         | 2.467 to 26.372                                                                                 |
| Reflections collected                                | 21230                                                                                           |
| Independent reflections                              | 9521 [ <i>R</i> <sub>(int)</sub> = 0.0626]                                                      |
| Data / restraints / parameters                       | 9521 / 0 / 726                                                                                  |
| Goodness-of-fit on <i>F</i> <sup>2</sup>             | 1.062                                                                                           |
| <i>R</i> 1 <sup>a</sup> [ <i>I</i> > 2σ( <i>I</i> )] | 0.0630                                                                                          |
| <i>wR</i> 2 <sup>b</sup> (all data)                  | 0.2146                                                                                          |
| Largest diff. peak and hole [e.Å <sup>-3</sup> ]     | 0.33 and -0.34                                                                                  |

a:  $R1 = (\sum ||F_o| - |F_c||) / (\sum |F_o|)$ . b:  $wR2 = [\sum w(F_o^2 - F_c^2)^2 / \sum wF_o^4]^{1/2}$ , where  $w = 1/[\sigma^2(F_o^2) + (0.1000(F_o^2 + 2F_c^2)/3)^2]$

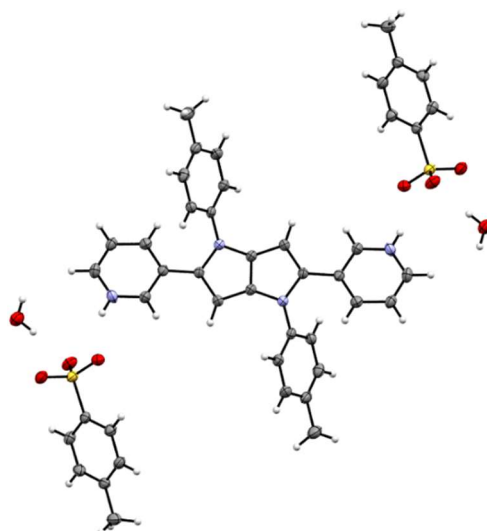

**Fig. S17** Crystal structure of **1•h**⊃H<sub>2</sub>O (123 K). Ellipsoids are plotted at the 50% probability level.

**Table S17** Crystallographic data for **1•h**⊃H<sub>2</sub>O (123 K).

| Compound                                             | <b>1•h</b> ⊃H <sub>2</sub> O                                                 |
|------------------------------------------------------|------------------------------------------------------------------------------|
| CCDC No.                                             | 1910454                                                                      |
| empirical formula                                    | C <sub>44</sub> H <sub>44</sub> N <sub>4</sub> O <sub>8</sub> S <sub>2</sub> |
| formula weight                                       | 820.95                                                                       |
| temperature [K]                                      | 123                                                                          |
| wavelength [Å]                                       | 0.71073                                                                      |
| crystal system                                       | triclinic                                                                    |
| space group                                          | P -1                                                                         |
| <i>a</i> [Å]                                         | 7.6993(4)                                                                    |
| <i>b</i> [Å]                                         | 11.1583(9)                                                                   |
| <i>c</i> [Å]                                         | 11.5390(10)                                                                  |
| $\alpha$ [°]                                         | 89.783(7)                                                                    |
| $\beta$ [°]                                          | 85.718(6)                                                                    |
| $\gamma$ [°]                                         | 84.804(5)                                                                    |
| Volume [Å <sup>3</sup> ]                             | 984.49(13)                                                                   |
| <i>Z</i>                                             | 1                                                                            |
| Density (calculated) [g/cm <sup>3</sup> ]            | 1.385                                                                        |
| Absorption coefficient [mm <sup>-1</sup> ]           | 0.197                                                                        |
| <i>F</i> (000)                                       | 432.0                                                                        |
| $\theta$ [°]                                         | 2.544 to 26.371                                                              |
| Reflections collected                                | 8832                                                                         |
| Independent reflections                              | 4029 [ <i>R</i> <sub>(int)</sub> = 0.0376]                                   |
| Data / restraints / parameters                       | 4029 / 0 / 271                                                               |
| Goodness-of-fit on <i>F</i> <sup>2</sup>             | 1.085                                                                        |
| <i>R</i> 1 <sup>a</sup> [ <i>I</i> > 2σ( <i>I</i> )] | 0.0543                                                                       |
| <i>wR</i> 2 <sup>b</sup> (all data)                  | 0.1547                                                                       |
| Largest diff. peak and hole [e.Å <sup>-3</sup> ]     | 0.34 and -0.46                                                               |

a:  $R1 = (\sum ||F_o| - |F_c||) / (\sum |F_o|)$ . b:  $wR2 = [\sum w(F_o^2 - F_c^2)^2 / \sum wF_o^4]^{1/2}$ , where  $w = 1 / [\sigma^2(F_o^2) + (0.0650(F_o^2 + 2F_c^2)/3)^2 + 0.7200(F_o^2 + 2F_c^2)/3]$

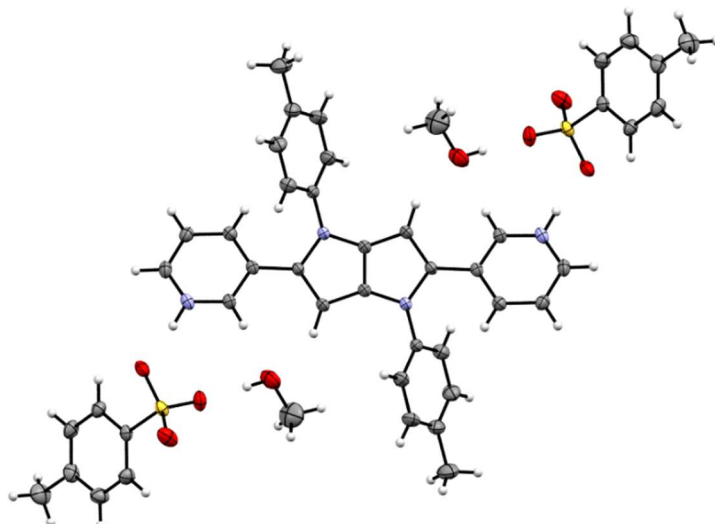

**Fig. S18** Crystal structure of **1•h** ⊃ CH<sub>3</sub>OH (123 K). Ellipsoids are plotted at the 50% probability level.

**Table S18** Crystallographic data for **1•h** ⊃ CH<sub>3</sub>OH (123 K).

| Compound                                             | <b>1•h</b> ⊃ CH <sub>3</sub> OH                                              |
|------------------------------------------------------|------------------------------------------------------------------------------|
| CCDC No.                                             | 1910455                                                                      |
| empirical formula                                    | C <sub>46</sub> H <sub>48</sub> N <sub>4</sub> O <sub>8</sub> S <sub>2</sub> |
| formula weight                                       | 849.00                                                                       |
| temperature [K]                                      | 123                                                                          |
| wavelength [Å]                                       | 0.71073                                                                      |
| crystal system                                       | monoclinic                                                                   |
| space group                                          | P2 <sub>1</sub> /n                                                           |
| <i>a</i> [Å]                                         | 16.4360(4)                                                                   |
| <i>b</i> [Å]                                         | 7.74190(10)                                                                  |
| <i>c</i> [Å]                                         | 16.8951(4)                                                                   |
| $\alpha$ [°]                                         | 90                                                                           |
| $\beta$ [°]                                          | 98.106(2)                                                                    |
| $\gamma$ [°]                                         | 90                                                                           |
| Volume [Å <sup>3</sup> ]                             | 2128.35(8)                                                                   |
| <i>Z</i>                                             | 2                                                                            |
| Density (calculated) [g/cm <sup>3</sup> ]            | 1.325                                                                        |
| Absorption coefficient [mm <sup>-1</sup> ]           | 0.184                                                                        |
| <i>F</i> (000)                                       | 896.0                                                                        |
| $\theta$ [°]                                         | 2.899 to 26.37                                                               |
| Reflections collected                                | 25342                                                                        |
| Independent reflections                              | 4353 [ <i>R</i> <sub>(int)</sub> = 0.0254]                                   |
| Data / restraints / parameters                       | 4353 / 0 / 279                                                               |
| Goodness-of-fit on <i>F</i> <sup>2</sup>             | 0.913                                                                        |
| <i>R</i> 1 <sup>a</sup> [ <i>I</i> > 2σ( <i>I</i> )] | 0.0381                                                                       |
| <i>wR</i> 2 <sup>b</sup> (all data)                  | 0.1184                                                                       |
| Largest diff. peak and hole [e.Å <sup>-3</sup> ]     | 0.34 and -0.36                                                               |

a:  $R1 = (\sum ||F_o| - |F_c||) / (\sum |F_o|)$ . b:  $wR2 = [\sum w(F_o^2 - F_c^2)^2 / \sum wF_o^4]^{1/2}$ , where  $w = 1 / [\sigma^2(F_o^2) + (0.0770(F_o^2 + 2F_c^2)/3)^2 + 1.6640(F_o^2 + 2F_c^2)/3]$

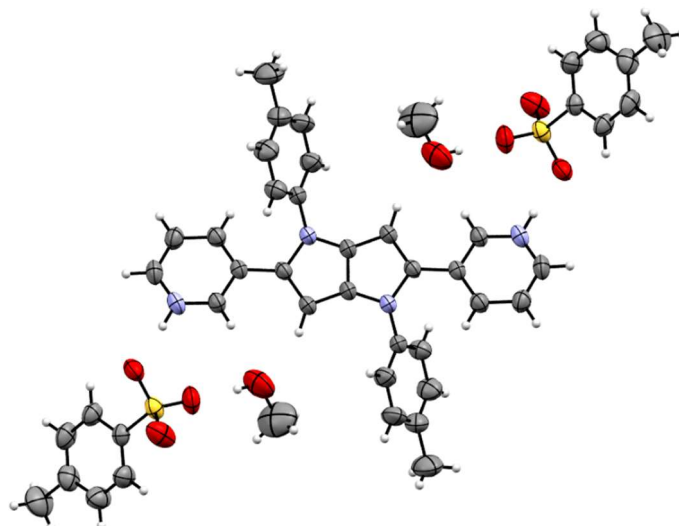

**Fig. S19** Crystal structure of **1•h**⊃CH<sub>3</sub>OH (298 K). Ellipsoids are plotted at the 50% probability level.

**Table S19** Crystallographic data for **1•h**⊃CH<sub>3</sub>OH (298 K).

| Compound                                             | <b>1•h</b> ⊃CH <sub>3</sub> OH                                               |
|------------------------------------------------------|------------------------------------------------------------------------------|
| CCDC No.                                             | 1910456                                                                      |
| empirical formula                                    | C <sub>46</sub> H <sub>48</sub> N <sub>4</sub> O <sub>8</sub> S <sub>2</sub> |
| formula weight                                       | 849.00                                                                       |
| temperature [K]                                      | 298                                                                          |
| wavelength [Å]                                       | 0.71073                                                                      |
| crystal system                                       | monoclinic                                                                   |
| space group                                          | P2 <sub>1</sub> /n                                                           |
| <i>a</i> [Å]                                         | 16.5791(7)                                                                   |
| <i>b</i> [Å]                                         | 7.7313(3)                                                                    |
| <i>c</i> [Å]                                         | 17.2465(8)                                                                   |
| $\alpha$ [°]                                         | 90                                                                           |
| $\beta$ [°]                                          | 99.073(4)                                                                    |
| $\gamma$ [°]                                         | 90                                                                           |
| Volume [Å <sup>3</sup> ]                             | 2182.96(16)                                                                  |
| <i>Z</i>                                             | 2                                                                            |
| Density (calculated) [g/cm <sup>3</sup> ]            | 1.292                                                                        |
| Absorption coefficient [mm <sup>-1</sup> ]           | 0.180                                                                        |
| <i>F</i> (000)                                       | 896.0                                                                        |
| $\theta$ [°]                                         | 2.893 to 26.367                                                              |
| Reflections collected                                | 14532                                                                        |
| Independent reflections                              | 4466 [ <i>R</i> <sub>(int)</sub> = 0.0197]                                   |
| Data / restraints / parameters                       | 4466 / 0 / 279                                                               |
| Goodness-of-fit on <i>F</i> <sup>2</sup>             | 1.045                                                                        |
| <i>R</i> 1 <sup>a</sup> [ <i>I</i> > 2σ( <i>I</i> )] | 0.0434                                                                       |
| <i>wR</i> 2 <sup>b</sup> (all data)                  | 0.1314                                                                       |
| Largest diff. peak and hole [e.Å <sup>-3</sup> ]     | 0.21 and -0.29                                                               |

a:  $R1 = (\sum ||F_o| - |F_c||) / (\sum |F_o|)$ . b:  $wR2 = [\sum w(F_o^2 - F_c^2)^2 / \sum wF_o^4]^{1/2}$ , where  $w = 1 / [\sigma^2(F_o^2) + (0.0620(F_o^2 + 2F_c^2)/3)^2 + 0.7800(F_o^2 + 2F_c^2)/3]$

**Table S20** Elemental analysis of **1**.

| Compound | Observed |      |       | Calcd |      |       |
|----------|----------|------|-------|-------|------|-------|
|          | C        | H    | N     | C     | H    | N     |
| <b>1</b> | 81.40    | 5.51 | 12.73 | 81.79 | 5.49 | 12.72 |

**Table S21** The  $pK_a$  of **a-h** and  $\Delta pK_a$  ( $pK_a$  (**1**)<sup>[a]</sup> -  $pK_a$  (acid)).

|               | <b>a</b> | <b>b</b> | <b>c</b> | <b>d</b> | <b>e</b> | <b>f</b> | <b>g</b> | <b>h</b> |
|---------------|----------|----------|----------|----------|----------|----------|----------|----------|
| $pK_a$        | 10.0     | 8.2      | 5.5      | 4.2      | 3.5      | 2.9      | 1.5      | -1.3     |
| $\Delta pK_a$ | -4.3     | -2.5     | 0.2      | 1.5      | 2.2      | 2.8      | 4.2      | 7.0      |

[a]The  $pK_a$  value of pyridyl moiety of **1** is assumed to 5.7, which is taken from the  $pK_a$  value of 3-methylpyridine.

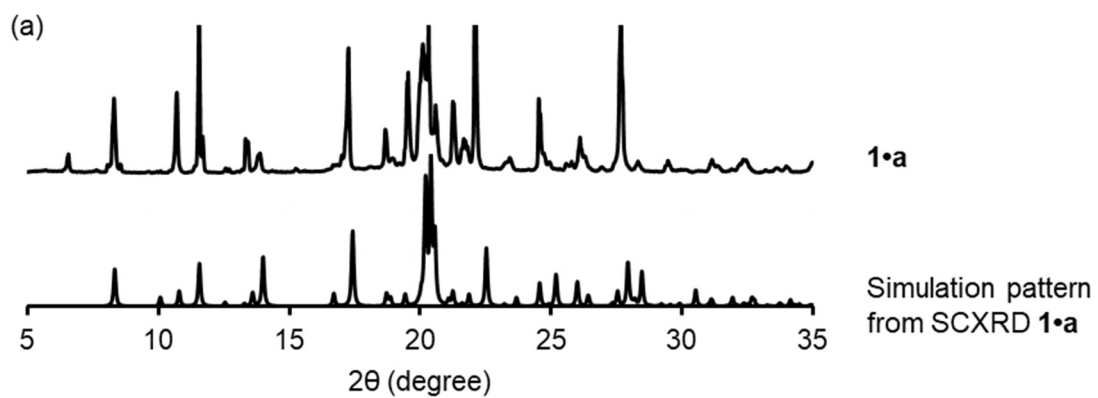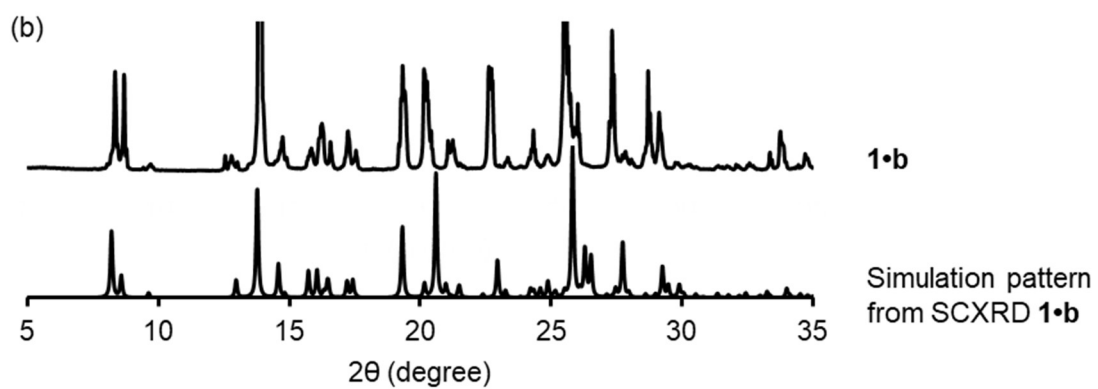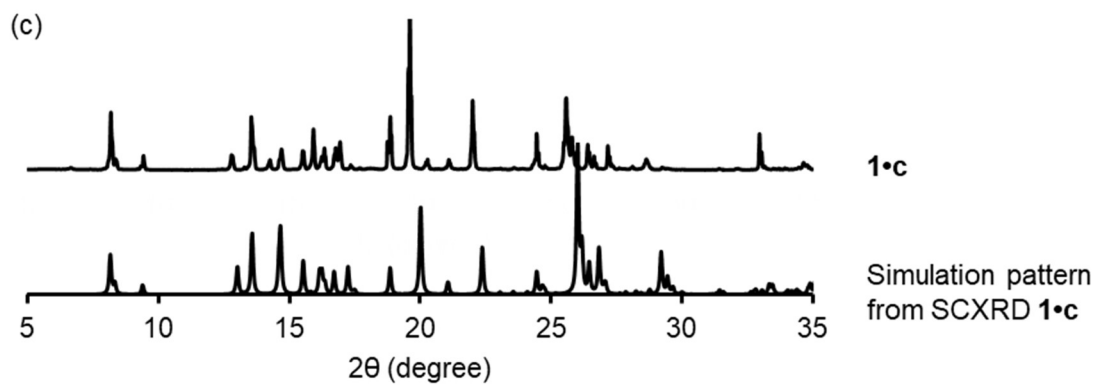

(d)

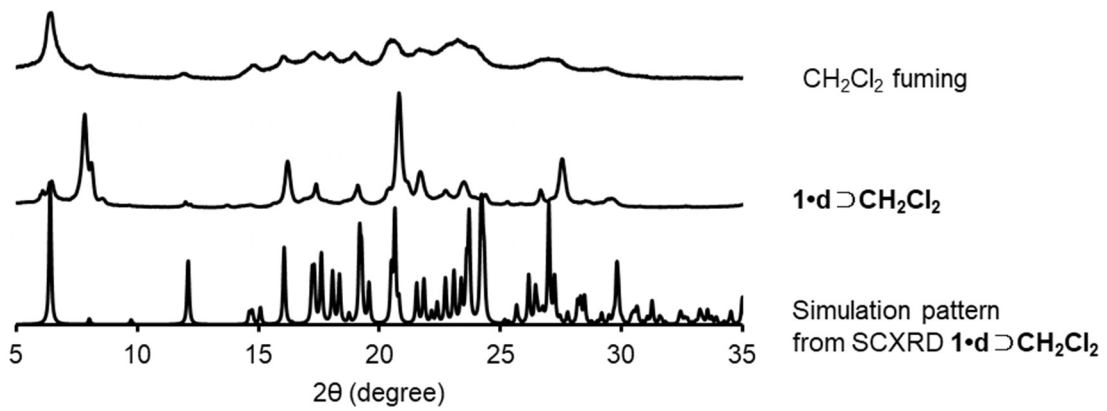

(e)

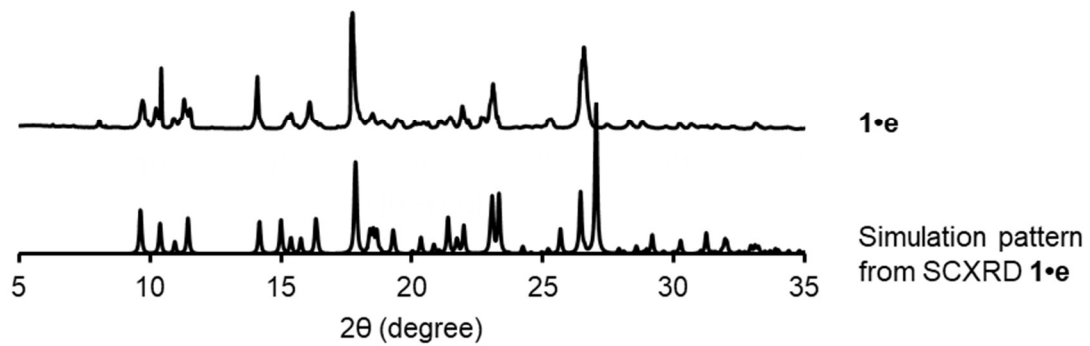

(f)

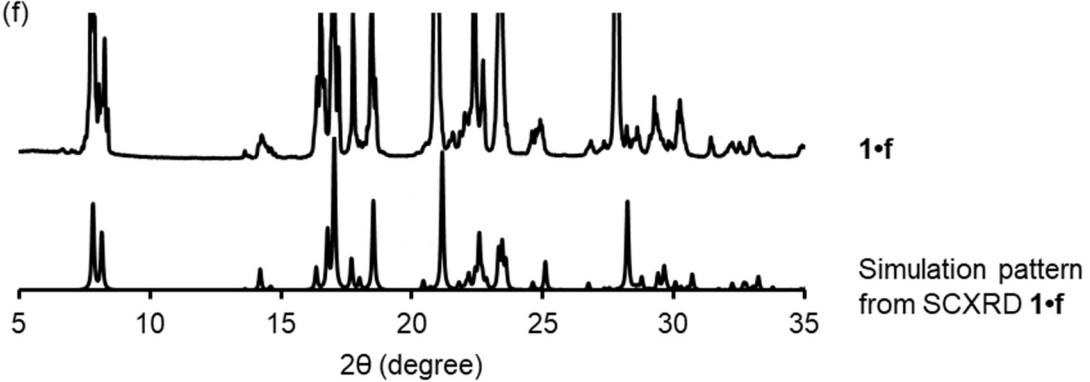



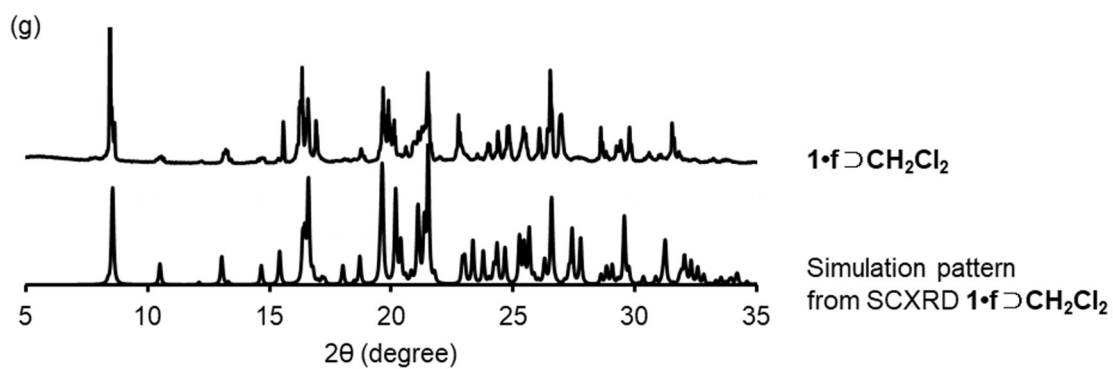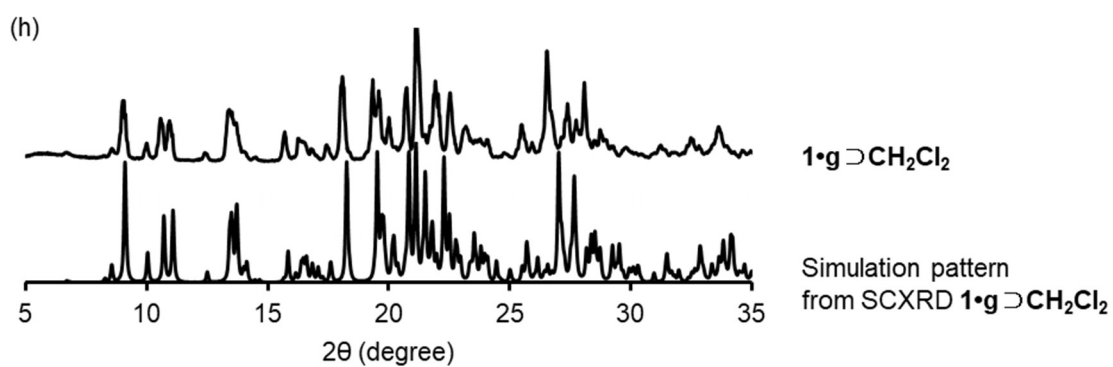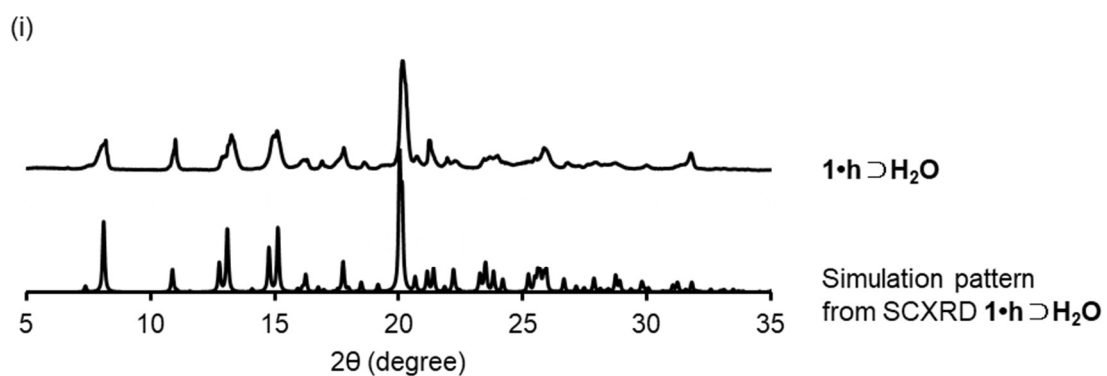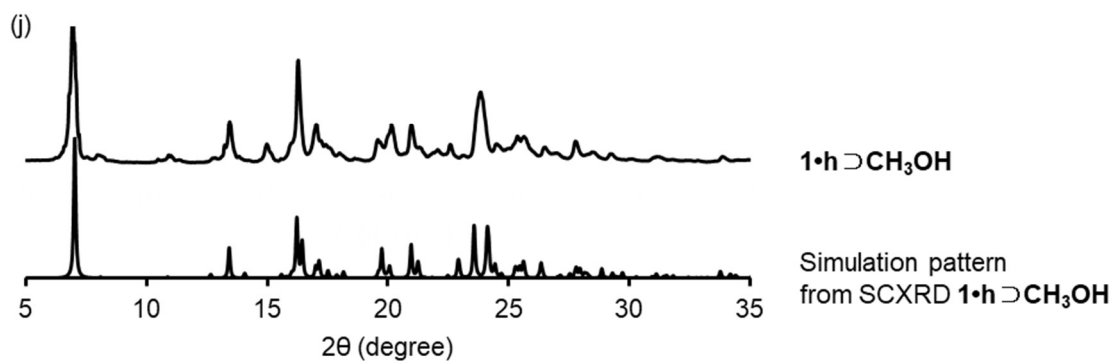

**Fig. S20** PXRD patterns of **1•acid** (upper) and corresponding simulation pattern from SCXRD at 123K (lower) (a) **1•a**, (b) **1•b**, (c) **1•c**, (d) **1•d**⊃CH<sub>2</sub>Cl<sub>2</sub>, (e) **1•e**, (f) **1•f**, (g) **1•f**⊃CH<sub>2</sub>Cl<sub>2</sub>, (h) **1•g**⊃CH<sub>2</sub>Cl<sub>2</sub>, (i) **1•h**⊃H<sub>2</sub>O, (j) **1•h**⊃CH<sub>3</sub>OH. In the case of **1•d**⊃CH<sub>2</sub>Cl<sub>2</sub>, desorption of CH<sub>2</sub>Cl<sub>2</sub> molecules is easily observed under room temperature. CH<sub>2</sub>Cl<sub>2</sub> vapor exposure to the resulting complex regenerated the formation of **1•d**⊃CH<sub>2</sub>Cl<sub>2</sub>.

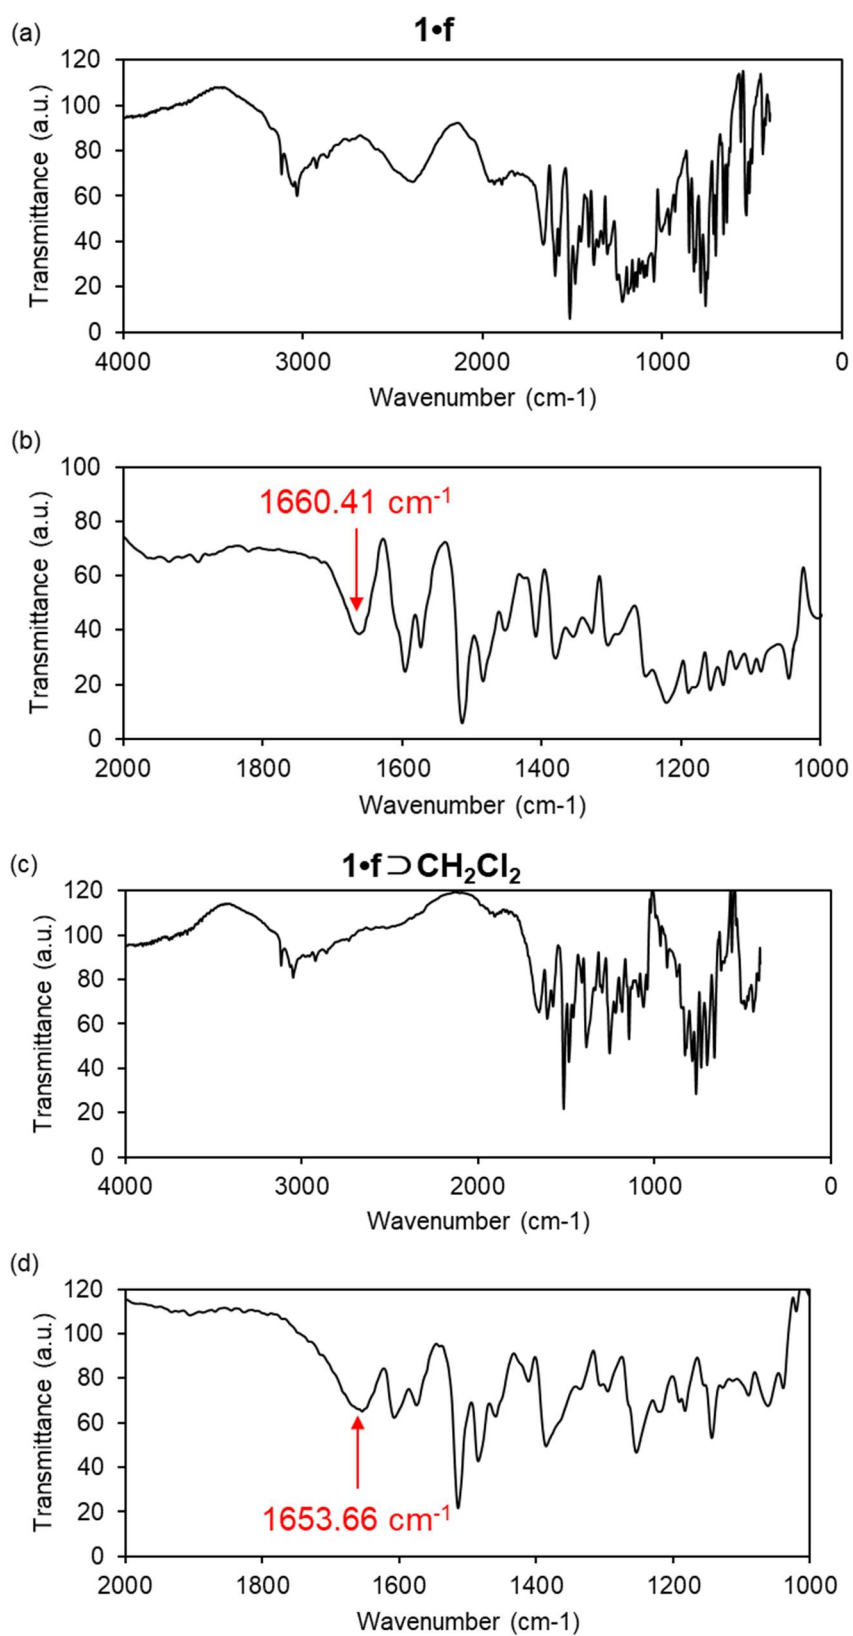

**Fig. S21** IR spectra of **1•f** (a) 400-4000 cm<sup>-1</sup>, (b) 1000-2000 cm<sup>-1</sup>, and **1•f**⊃CH<sub>2</sub>Cl<sub>2</sub> (c) 400-4000 cm<sup>-1</sup>, (d) 1000-2000 cm<sup>-1</sup>.

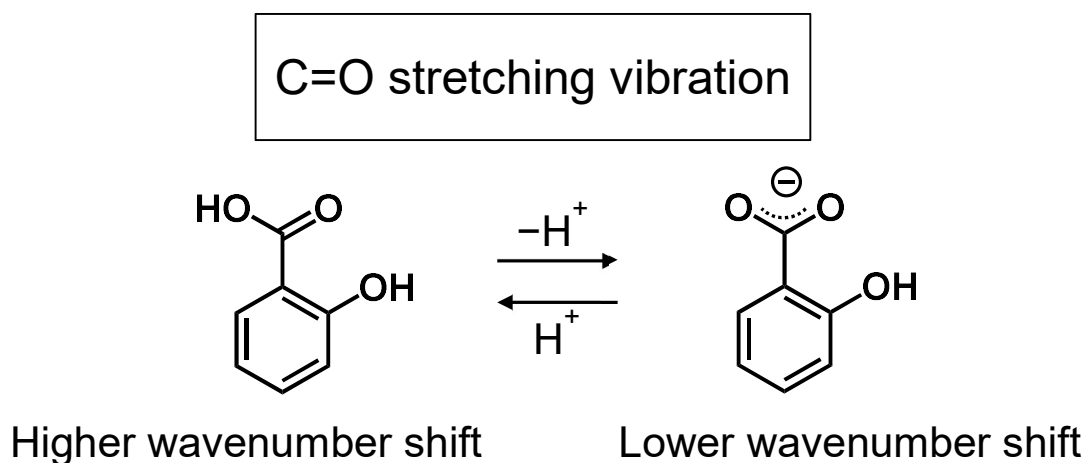

**Scheme S1** Schematic illustration of protonation/deprotonation of salicylic acid estimated by IR spectra.

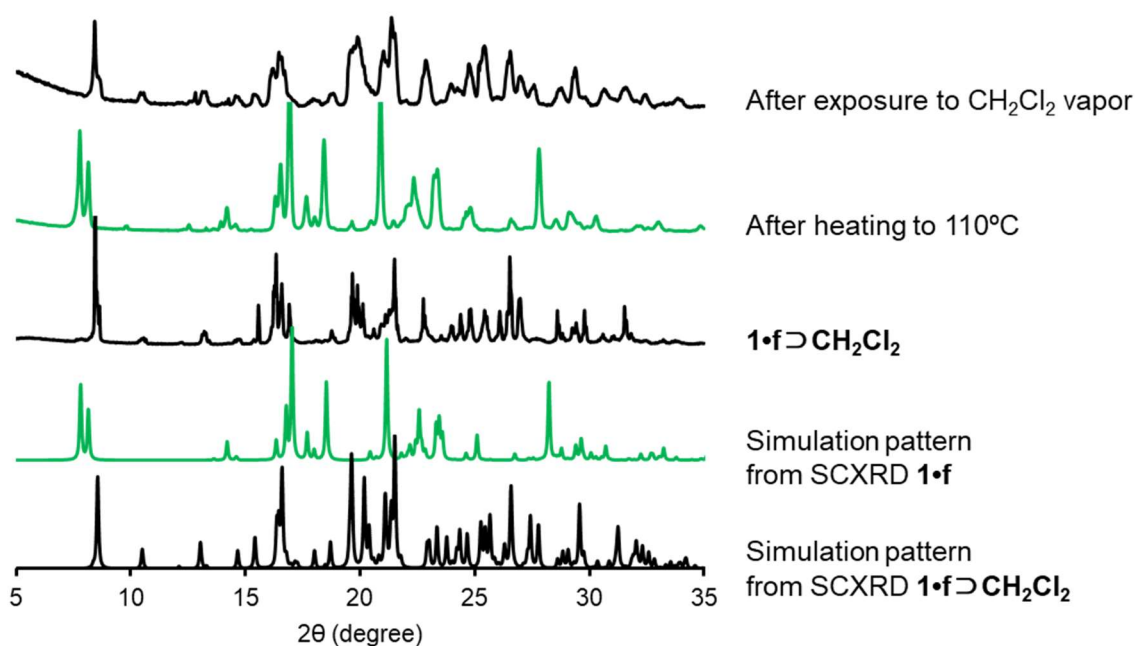

**Fig. S22** PXR patterns of  $1\cdot f \supset \text{CH}_2\text{Cl}_2$ , after heating to  $110^\circ\text{C}$ , and after exposure to  $\text{CH}_2\text{Cl}_2$  vapor against resulting powder. Simulated patterns of  $1\cdot f \supset \text{CH}_2\text{Cl}_2$  and  $1\cdot f$  from SCXRD are shown for comparison.

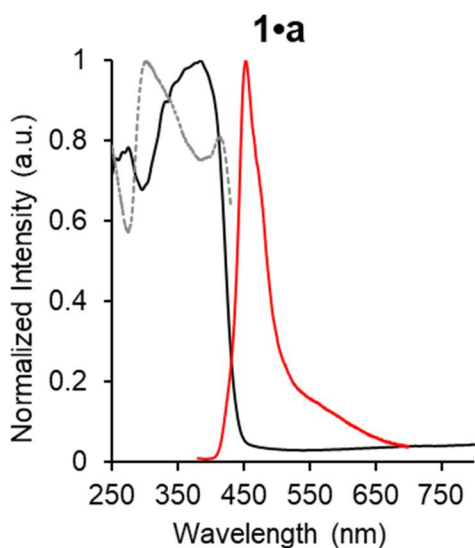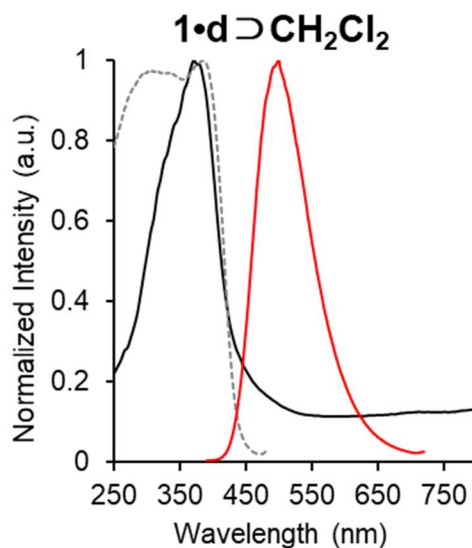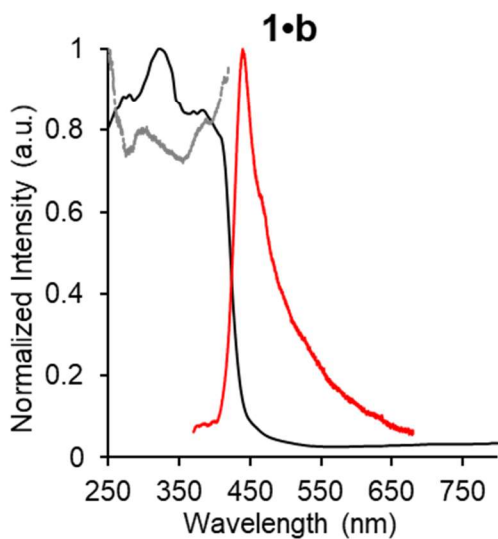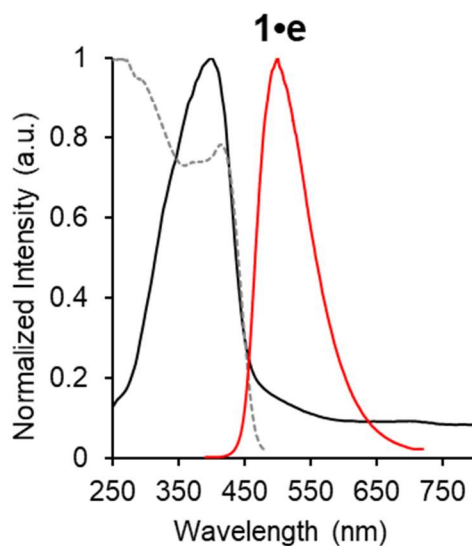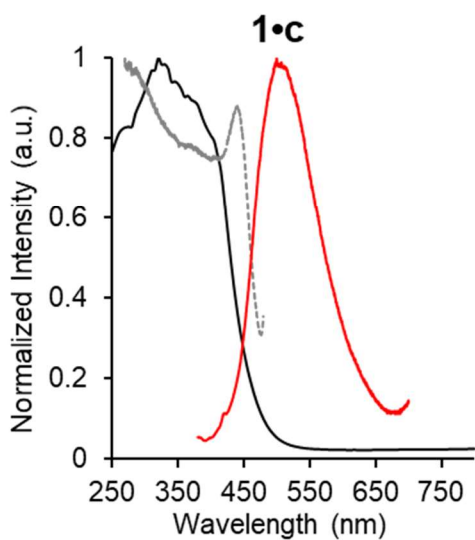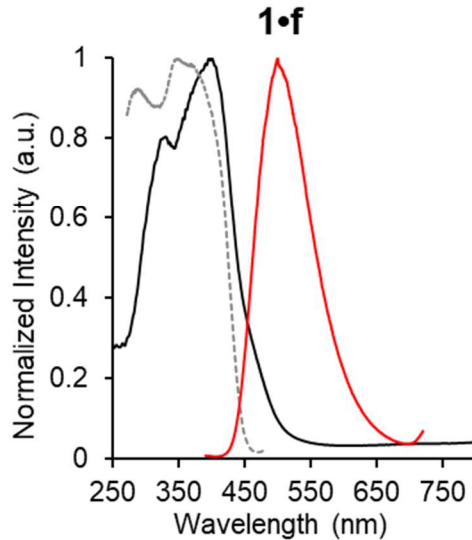

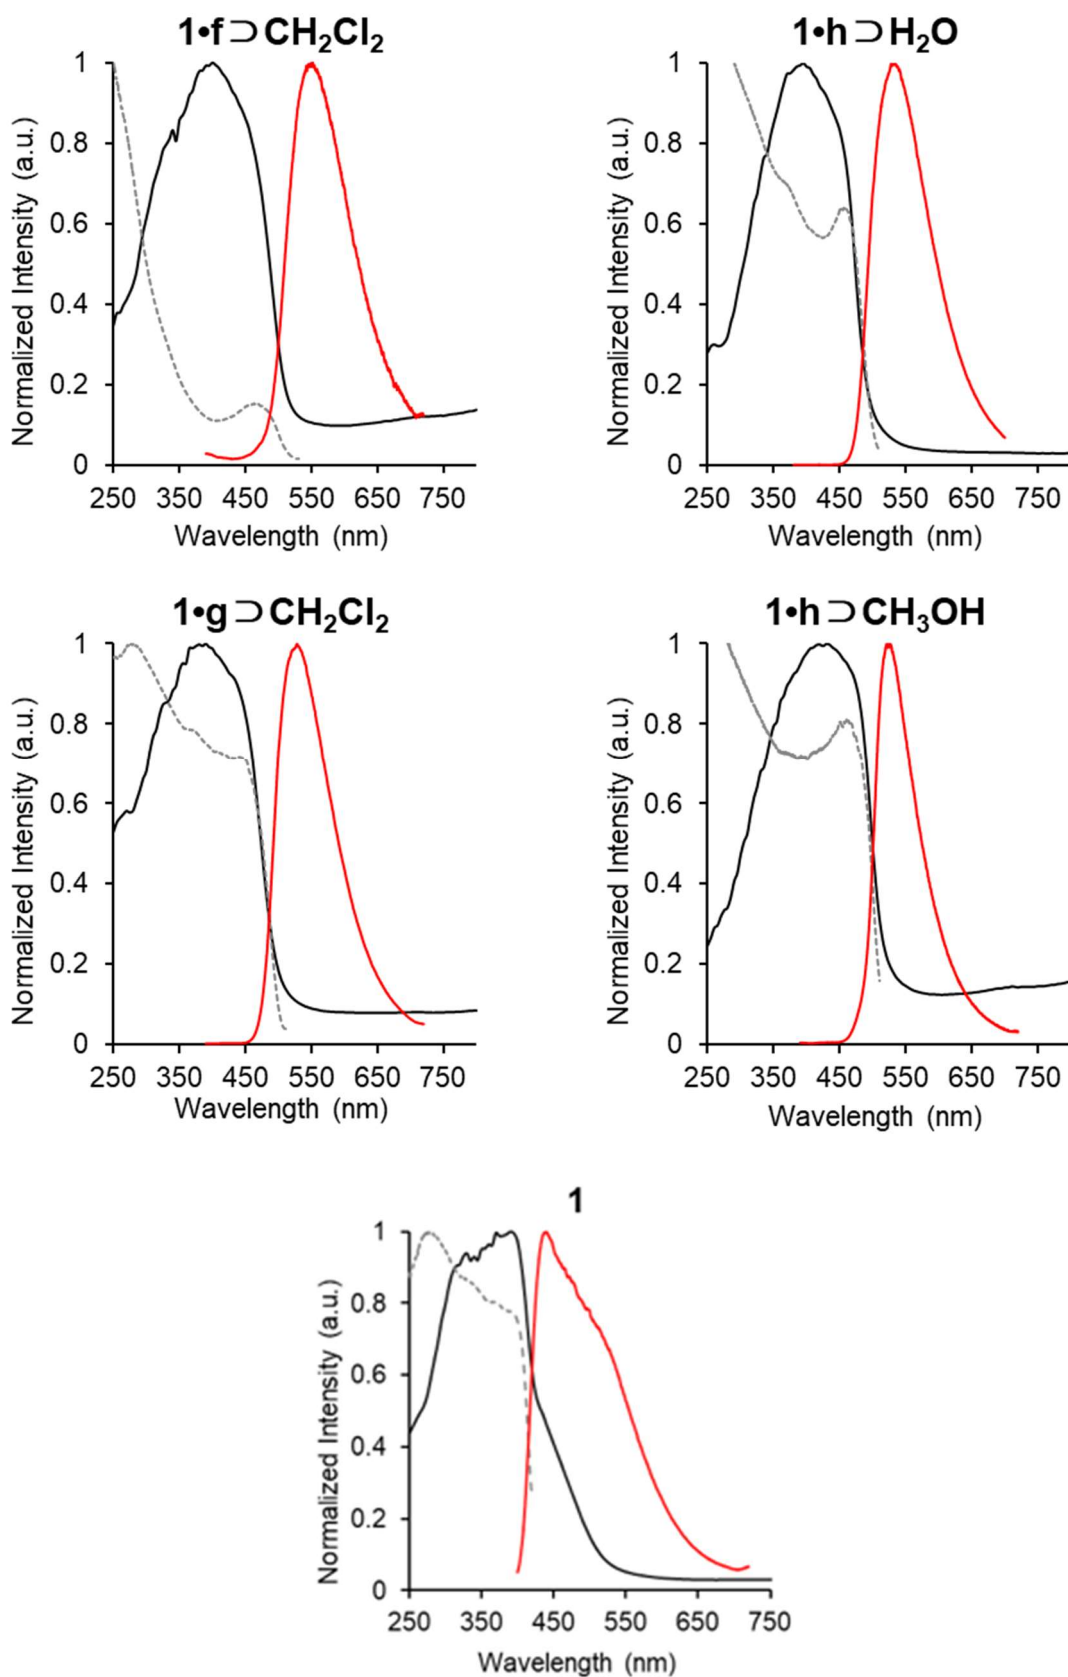

**Fig. S23** UV-vis diffuse-reflectance spectra (black line), emission spectra (red line), and excitation spectra (dotted line) of **1** and **1•acid**.

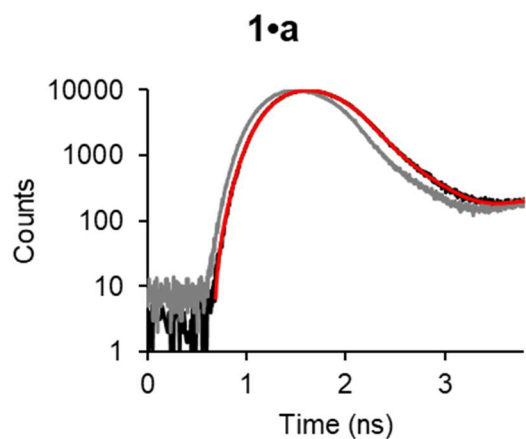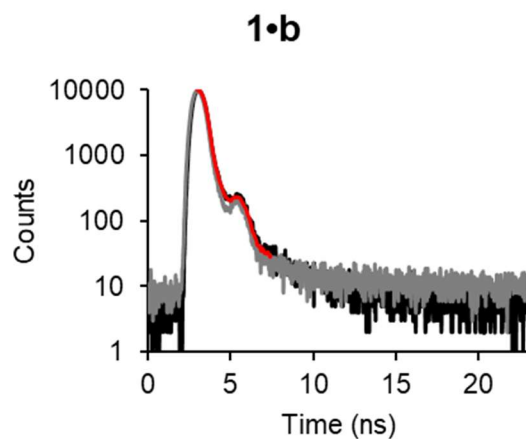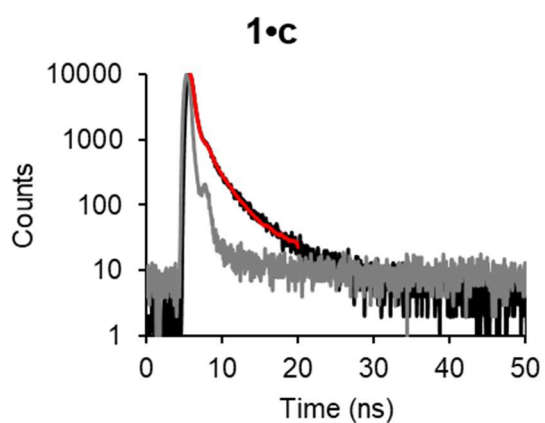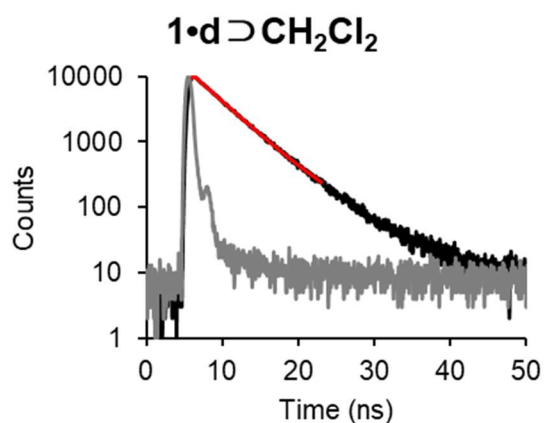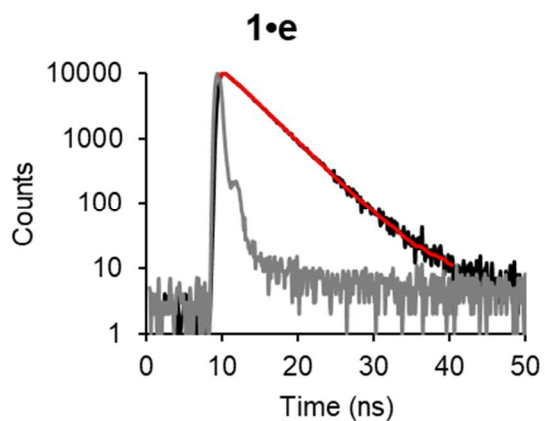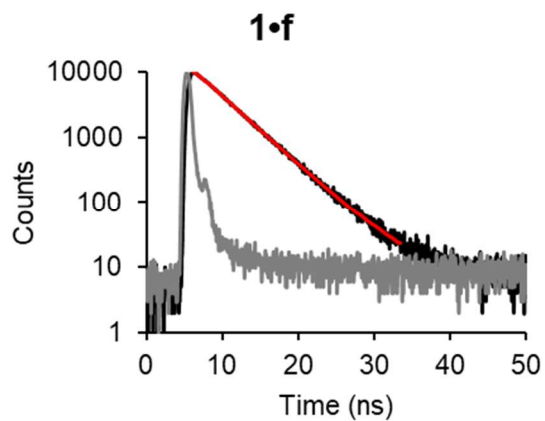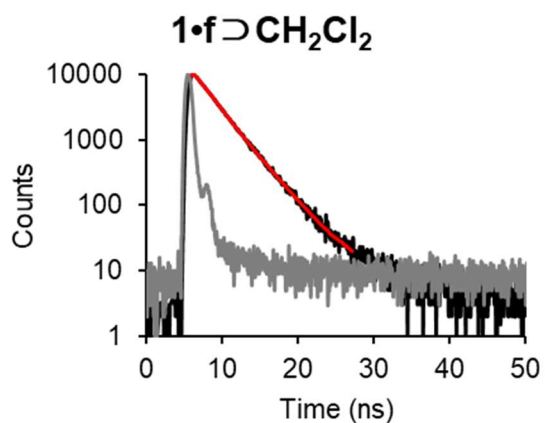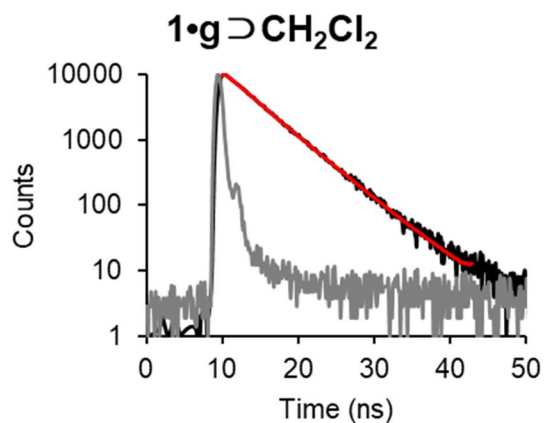

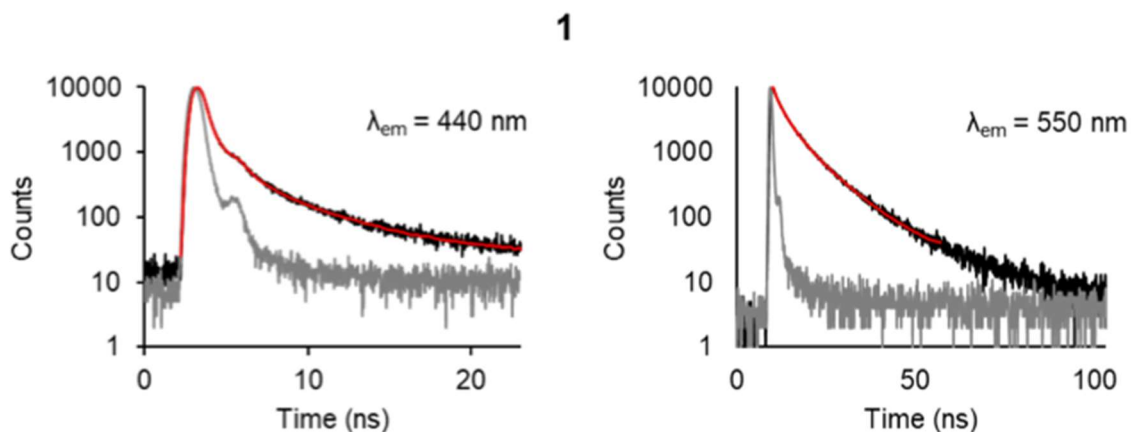

**Fig. S24** Emission decay curves (black line), fits (red line), and instrument response function (IRF) of **1** and **1•acid**.

**Table S22** Summary of lifetime analyses for **1** and **1•acid**. Emission lifetimes ( $\tau$ ), preexponential factor in percentage (% A).  $\lambda$  = emission wavelength of registration after excitation at 365 nm and  $\tau_{av}$  intensity average lifetime

| sample                                               | $\lambda$ (nm) | CHI  | $\tau_{av}$ (ns) | $\tau_1$ (ns) | $\tau_2$ (ns) | $\tau_3$ (ns) | A <sub>1</sub> | A <sub>2</sub> | A <sub>3</sub> |
|------------------------------------------------------|----------------|------|------------------|---------------|---------------|---------------|----------------|----------------|----------------|
| <b>1</b>                                             | 440            | 1.03 | 1.01             | 0.18          | 1.13          | 4.40          | 1134           | 64             | 12             |
| <b>1</b>                                             | 550            | 1.08 | 5.9              | 0.8           | 3.2           | 8.9           | 676            | 630            | 307            |
| <b>1•a</b>                                           | 453            | 1.02 | 0.1              | 0.1           | 0.5           | -             | 336            | 2.3            | -              |
| <b>1•b</b>                                           | 439            | 1.17 | 0.1              | 0.08          | 0.21          | 0.68          | 1516           | -135           | 3.4            |
| <b>1•c</b>                                           | 500            | 1.19 | 0.9              | 0.3           | 2.3           | -             | 2594           | 131            | -              |
| <b>1•d</b> $\supset$ CH <sub>2</sub> Cl <sub>2</sub> | 481            | 1.17 | 4.05             | 1.16          | 4.20          | -             | 115            | 638            | -              |
| <b>1•e</b>                                           | 500            | 1.07 | 1.66             | 3.81          | 63.2          | -             | 1380           | -2.92          | -              |
| <b>1•f</b>                                           | 500            | 1.11 | 3.17             | 3.79          | 9.69          | 10.3          | 668            | 641            | -572           |
| <b>1•f</b> $\supset$ CH <sub>2</sub> Cl <sub>2</sub> | 552            | 1.02 | 2.35             | 2.48          | 6.73          | 7.42          | 686            | 474            | -375           |
| <b>1•g</b> $\supset$ CH <sub>2</sub> Cl <sub>2</sub> | 528            | 1.05 | 3.86             | 3.60          | 6.89          | 11.13         | 1026           | 451            | -105           |
| <b>1•h</b> $\supset$ H <sub>2</sub> O                | 534            | 1.10 | 1.93             | 0.73          | 2.15          | -             | 628            | 1167           | -              |
| <b>1•h</b> $\supset$ CH <sub>3</sub> OH              | 524            | 1.03 | 3.05             | 1.12          | 3.3           | -             | 435            | 1114           | -              |



1

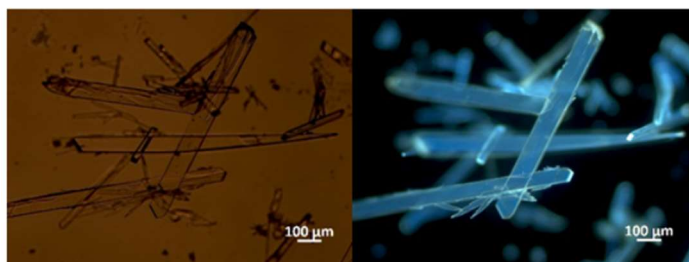

1•a

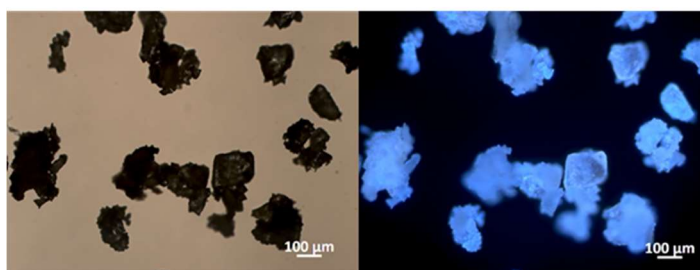

1•b

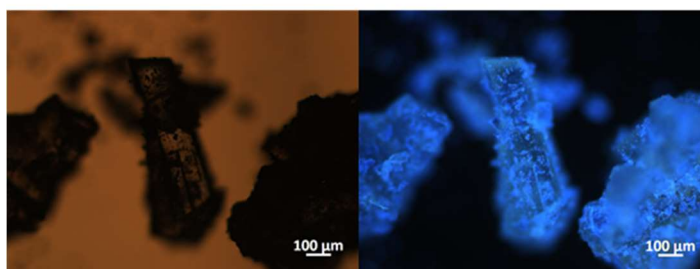

1•c

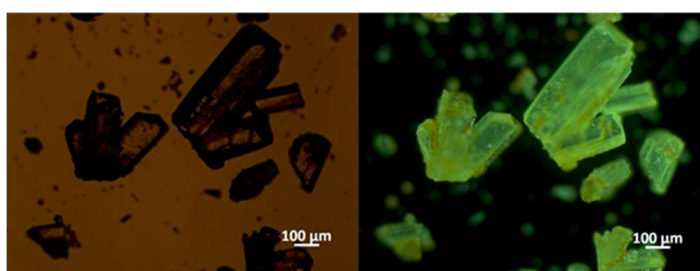

1•d  $\supset$  CH<sub>2</sub>Cl<sub>2</sub>

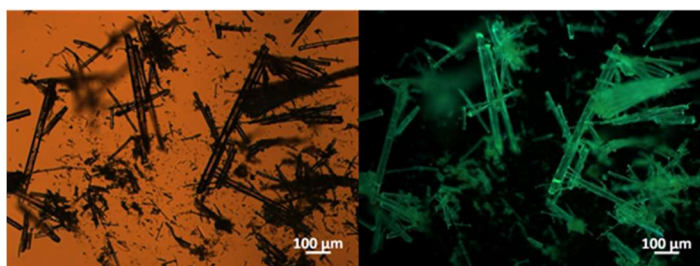

1•e

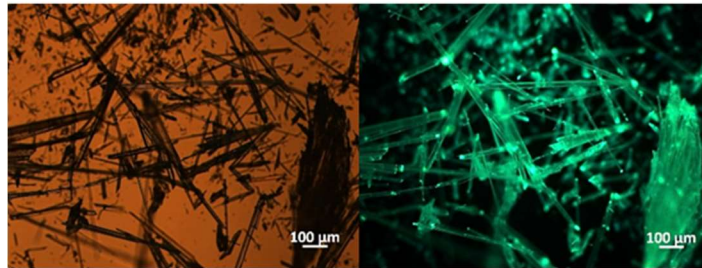

1•f

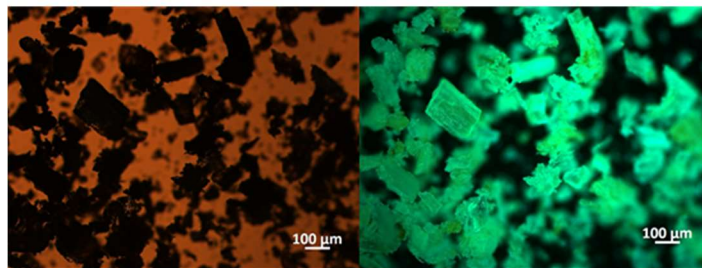

1•f ⊃ CH<sub>2</sub>Cl<sub>2</sub>

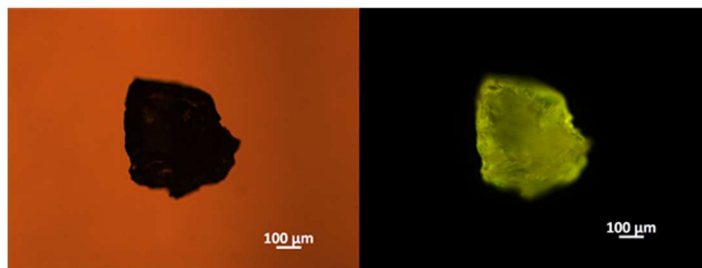

1•g ⊃ CH<sub>2</sub>Cl<sub>2</sub>

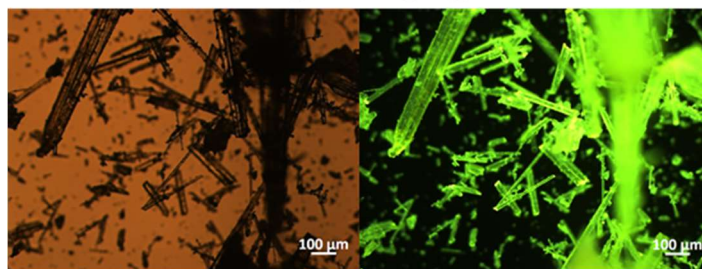

1•h ⊃ H<sub>2</sub>O

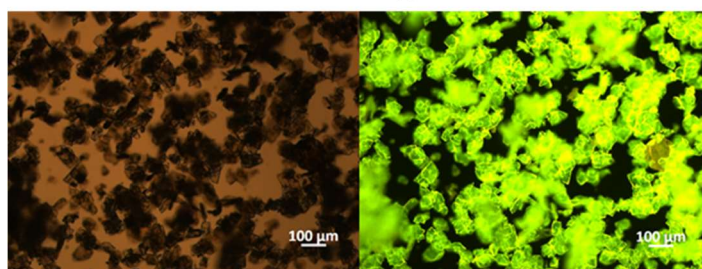

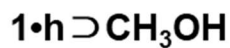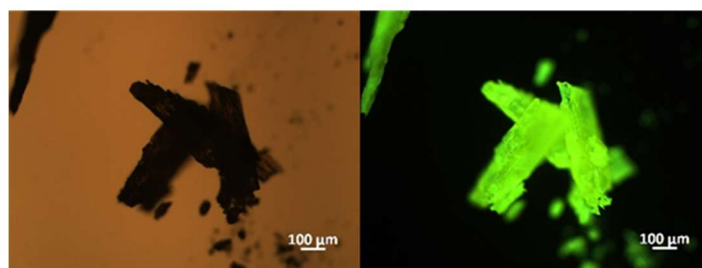

**Fig. S25** Photographs of **1** and **1•acid** under fluorescence microscope. Excitation = 330-380 nm, Emission > 420 nm.

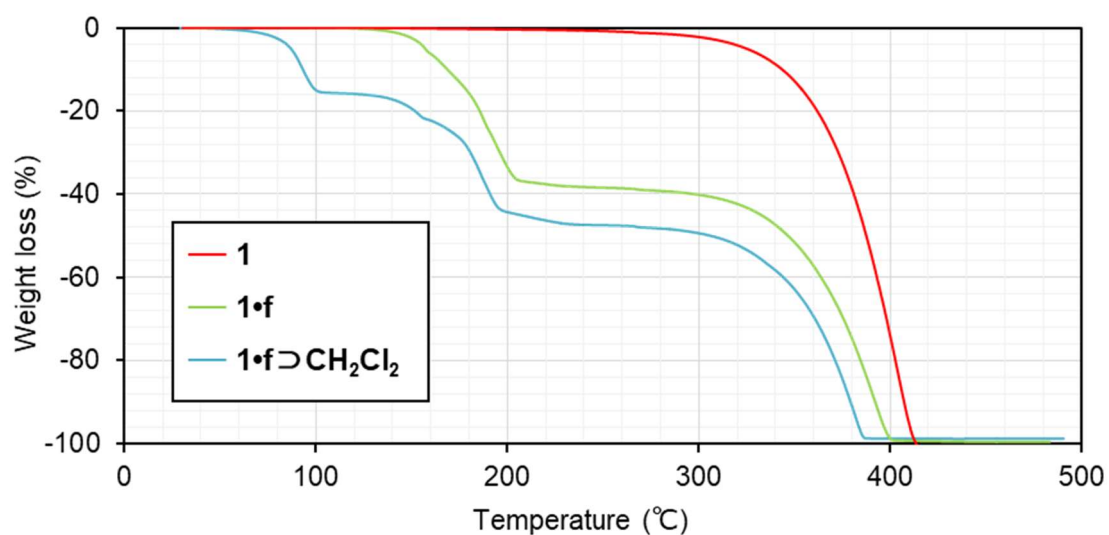

**Fig. S26** TG analyzes of **1** (red line), **1•f** (green line), and **1•f ⊃ CH<sub>2</sub>Cl<sub>2</sub>** (blue line). The measurements were conducted in nitrogen atmosphere at a heating rate of 10°C min<sup>-1</sup>, and the weights of samples were normalized to 100%. The result indicated that guest (CH<sub>2</sub>Cl<sub>2</sub>) removal of **1•f ⊃ CH<sub>2</sub>Cl<sub>2</sub>** is ca. 80°C.

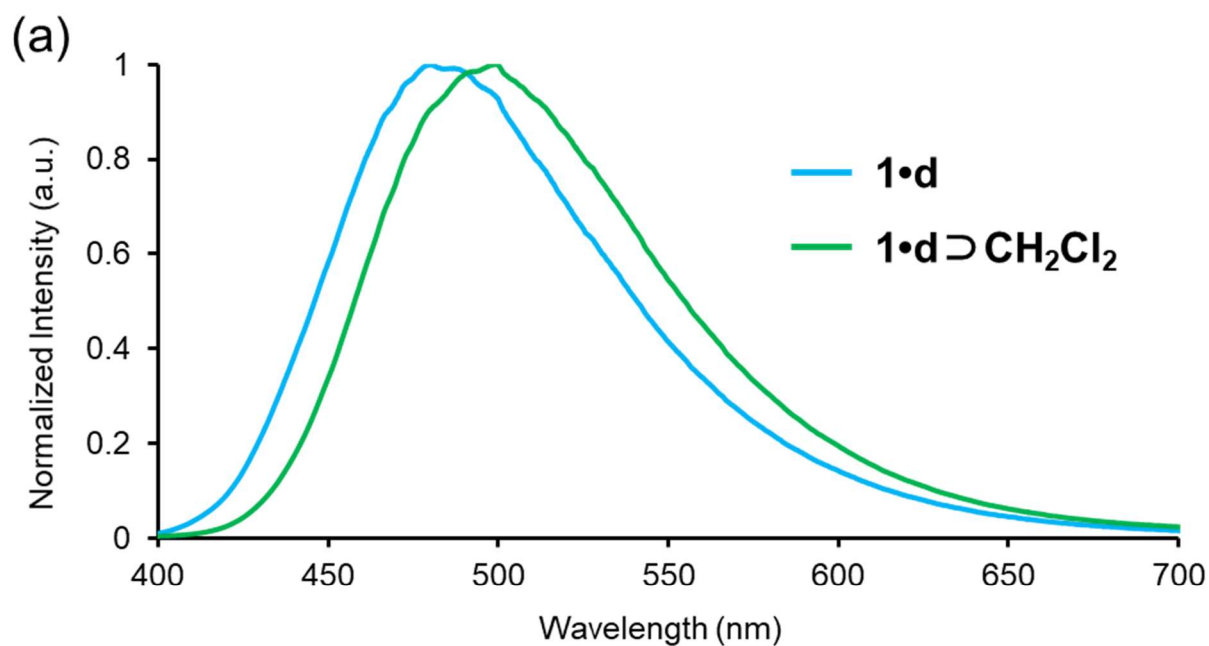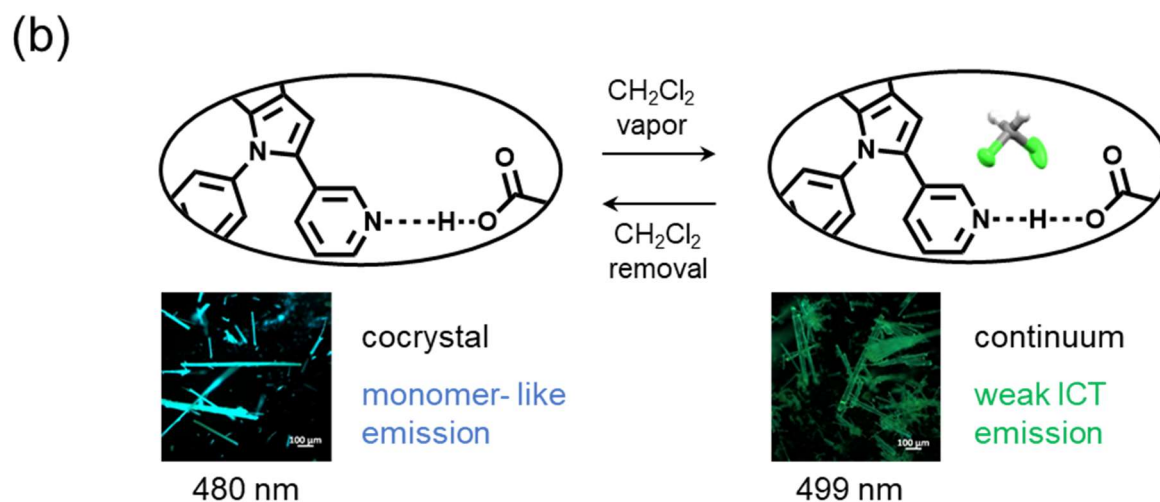

**Fig. S27** (a) Emission spectra of **1•d** and **1•d⊃CH<sub>2</sub>Cl<sub>2</sub>**. Excitation at 370 nm. (b) Schematic illustration of emission color tuning depends on desorption and inclusion of CH<sub>2</sub>Cl<sub>2</sub> against complexes.

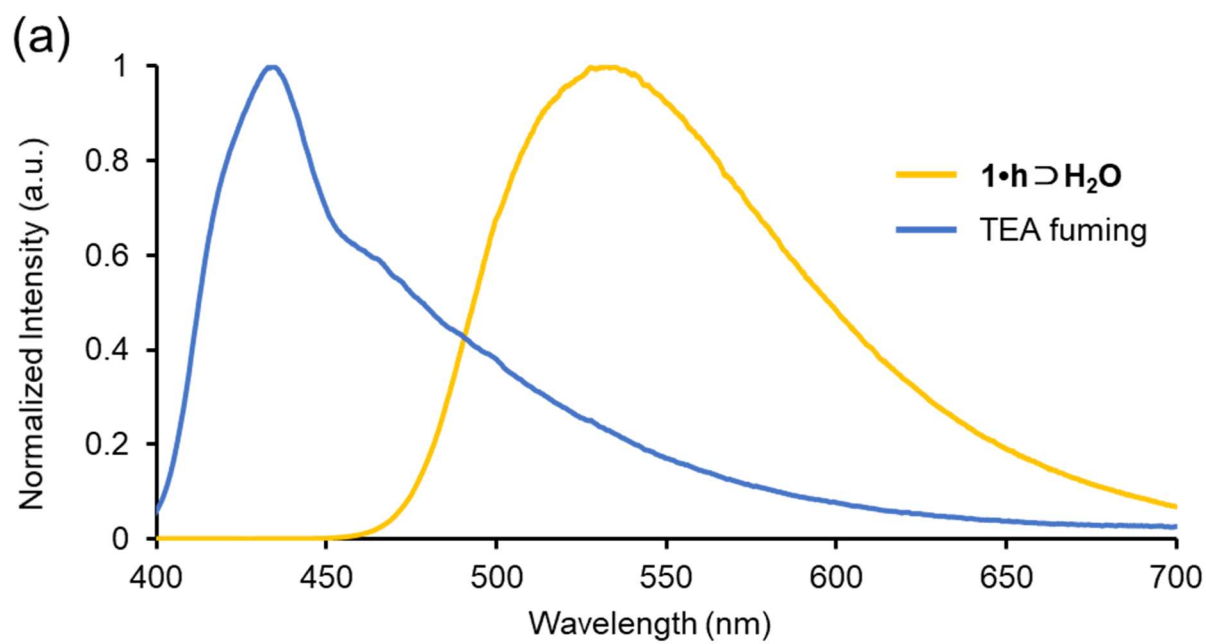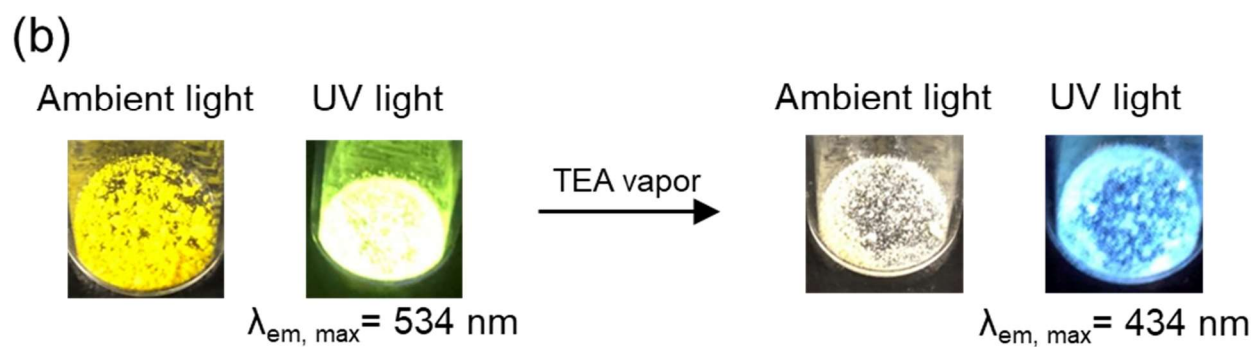

**Fig. S28** (a) Emission spectra of  $1\bullet f$ , and after fuming TEA vapor. (b) Photo of  $1\bullet f$ , and after fuming TEA vapor.

## General method of UV-Vis and fluorescence titration

### 1 and f in CH<sub>2</sub>Cl<sub>2</sub> solution

Path length of the cells used for absorption and emission studies was 1 cm. The stock solution of **1** was prepared ( $2.5 \times 10^{-4}$  M) in CH<sub>2</sub>Cl<sub>2</sub> (Stock A). The stock solution of acid (**f**) was prepared ( $2.5 \times 10^{-4}$  M) in CH<sub>2</sub>Cl<sub>2</sub> (Stock B). Stock A, Stock B, and CH<sub>2</sub>Cl<sub>2</sub> were mixed according to Table S23, and UV-vis and emission spectra were measured. Final concentration of **1** is  $2.5 \times 10^{-5}$  M.

**Table S23** Mixing condition of **1** and **f** in CH<sub>2</sub>Cl<sub>2</sub>.

| Equivalent of <b>f</b> to <b>1</b> | Stock A     | Stock B     | CH <sub>2</sub> Cl <sub>2</sub> |
|------------------------------------|-------------|-------------|---------------------------------|
| 0 eq.                              | 500 $\mu$ l | 0 $\mu$ l   | 4500 $\mu$ l                    |
| 1 eq.                              | 500 $\mu$ l | 50 $\mu$ l  | 4450 $\mu$ l                    |
| 2 eq.                              | 500 $\mu$ l | 100 $\mu$ l | 4400 $\mu$ l                    |
| 3 eq.                              | 500 $\mu$ l | 150 $\mu$ l | 4350 $\mu$ l                    |
| 4 eq.                              | 500 $\mu$ l | 200 $\mu$ l | 4300 $\mu$ l                    |
| 5 eq.                              | 500 $\mu$ l | 250 $\mu$ l | 4250 $\mu$ l                    |
| 6 eq.                              | 500 $\mu$ l | 300 $\mu$ l | 4200 $\mu$ l                    |
| 7 eq.                              | 500 $\mu$ l | 350 $\mu$ l | 4150 $\mu$ l                    |
| 8 eq.                              | 500 $\mu$ l | 400 $\mu$ l | 4100 $\mu$ l                    |
| 9 eq.                              | 500 $\mu$ l | 450 $\mu$ l | 4050 $\mu$ l                    |
| 10 eq.                             | 500 $\mu$ l | 500 $\mu$ l | 4000 $\mu$ l                    |

### 1 and g in CHCl<sub>3</sub> solution

Path length of the cells used for absorption and emission studies was 1cm. The stock solutions of **1** was prepared ( $2.5 \times 10^{-4}$  M) in CHCl<sub>3</sub> (Stock C). The stock solutions of acid (**g**) was prepared ( $2.5 \times 10^{-4}$  M) in CHCl<sub>3</sub> (Stock D). Stock C, Stock D, and CHCl<sub>3</sub> were mixed according to Table S24, and UV-vis and emission spectra were measured. Final concentration of **1** is  $2.5 \times 10^{-5}$  M. CHCl<sub>3</sub> was used due to **g** was poor solubility in CH<sub>2</sub>Cl<sub>2</sub>.

**Table S24** Mixing condition of **1** and **g** in CHCl<sub>3</sub>.

| Equivalent of <b>g</b> to <b>1</b> | Stock C     | Stock D     | CH <sub>2</sub> Cl <sub>2</sub> |
|------------------------------------|-------------|-------------|---------------------------------|
| 0 eq.                              | 500 $\mu$ l | 0 $\mu$ l   | 4500 $\mu$ l                    |
| 0.5 eq.                            | 500 $\mu$ l | 25 $\mu$ l  | 4475 $\mu$ l                    |
| 1 eq.                              | 500 $\mu$ l | 50 $\mu$ l  | 4450 $\mu$ l                    |
| 1.5 eq.                            | 500 $\mu$ l | 75 $\mu$ l  | 4425 $\mu$ l                    |
| 2 eq.                              | 500 $\mu$ l | 100 $\mu$ l | 4400 $\mu$ l                    |
| 2.5 eq.                            | 500 $\mu$ l | 125 $\mu$ l | 4375 $\mu$ l                    |
| 3 eq.                              | 500 $\mu$ l | 150 $\mu$ l | 4350 $\mu$ l                    |
| 3.5 eq.                            | 500 $\mu$ l | 175 $\mu$ l | 4325 $\mu$ l                    |
| 4 eq.                              | 500 $\mu$ l | 200 $\mu$ l | 4300 $\mu$ l                    |
| 4.5 eq.                            | 500 $\mu$ l | 225 $\mu$ l | 4275 $\mu$ l                    |
| 5 eq.                              | 500 $\mu$ l | 250 $\mu$ l | 4250 $\mu$ l                    |
| 5.5 eq.                            | 500 $\mu$ l | 275 $\mu$ l | 4225 $\mu$ l                    |
| 6 eq.                              | 500 $\mu$ l | 300 $\mu$ l | 4200 $\mu$ l                    |
| 6.5                                | 500 $\mu$ l | 325 $\mu$ l | 4175 $\mu$ l                    |
| 7 eq.                              | 500 $\mu$ l | 350 $\mu$ l | 4150 $\mu$ l                    |
| 7.5 eq.                            | 500 $\mu$ l | 375 $\mu$ l | 4125 $\mu$ l                    |
| 8 eq.                              | 500 $\mu$ l | 400 $\mu$ l | 4100 $\mu$ l                    |
| 8.5 eq.                            | 500 $\mu$ l | 425 $\mu$ l | 4075 $\mu$ l                    |
| 9 eq.                              | 500 $\mu$ l | 450 $\mu$ l | 4050 $\mu$ l                    |
| 9.5eq.                             | 500 $\mu$ l | 475 $\mu$ l | 4025 $\mu$ l                    |
| 10 eq.                             | 500 $\mu$ l | 500 $\mu$ l | 4000 $\mu$ l                    |



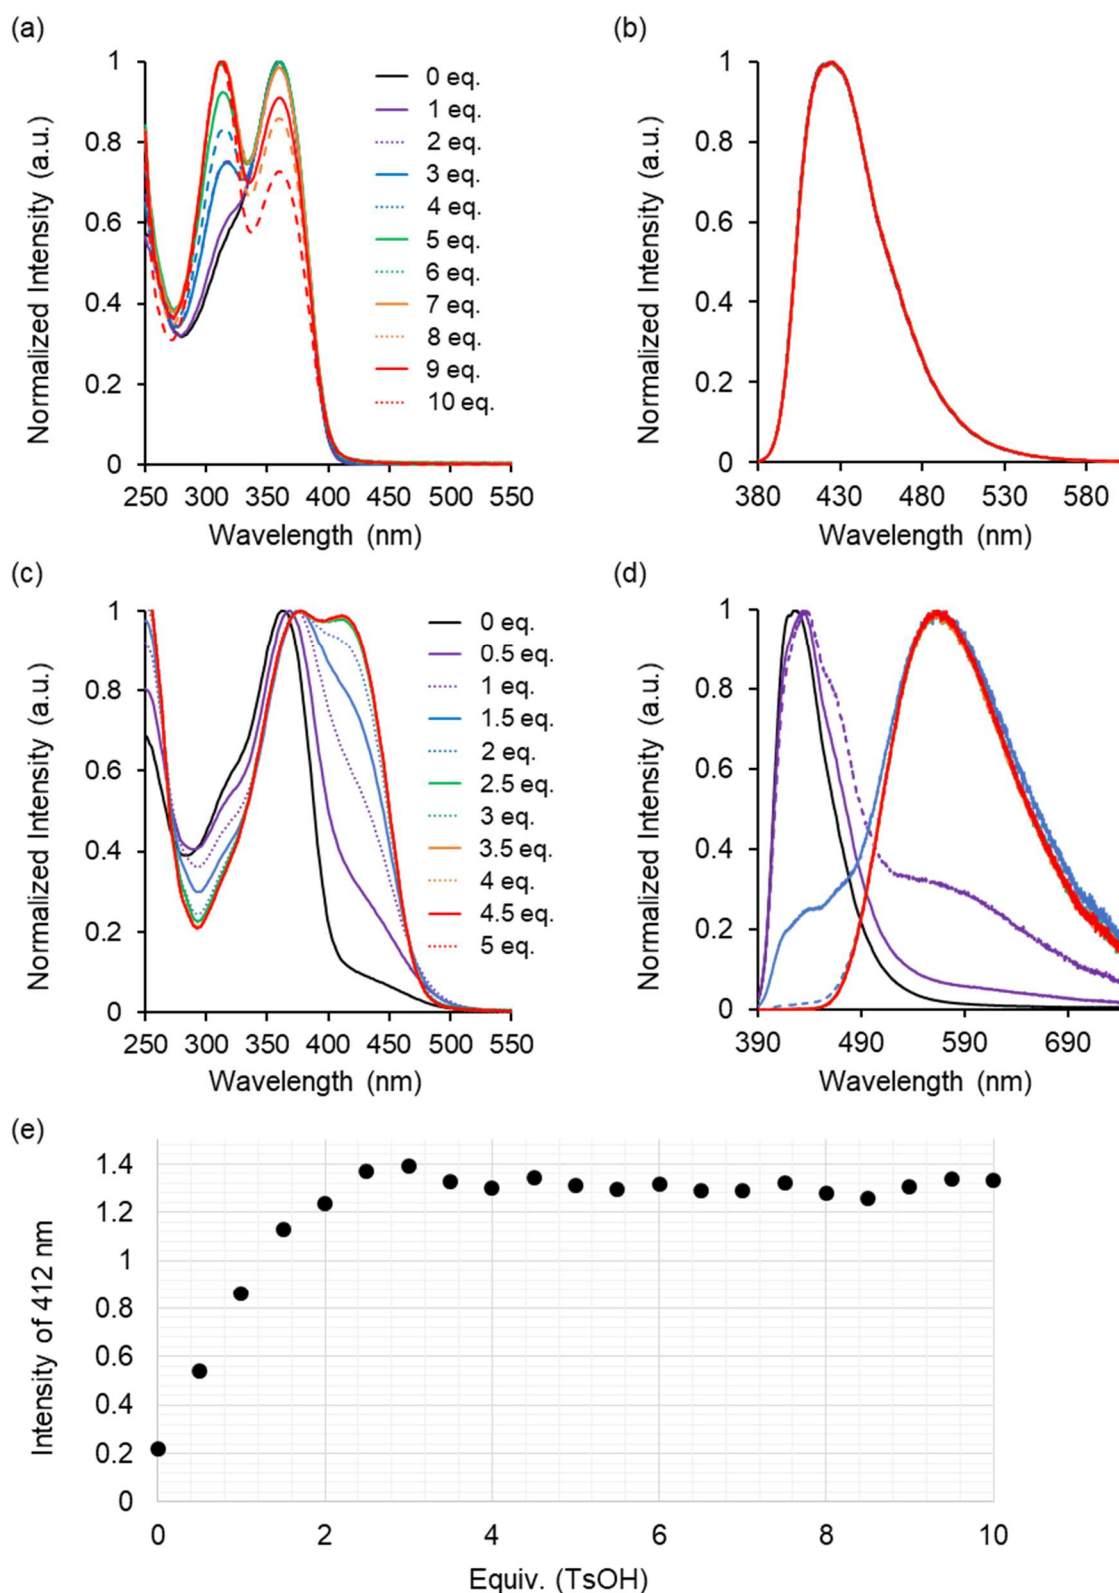

**Fig. S29** (a) UV-vis spectra of mixture of **1** and **f** in CH<sub>2</sub>Cl<sub>2</sub>, (b) Emission spectra of mixture of **1** and **f** in CH<sub>2</sub>Cl<sub>2</sub>, (c) UV-vis spectra of mixture of **1** and **g** in CHCl<sub>3</sub> (d) Emission spectra of mixture of **1** and **g** in CHCl<sub>3</sub>, (e) Relationship between emission intensity at 412 nm and equivalent of acid (**g**) to **1**.



## DFT calculation

The geometry of **1** was optimized by performing DFT calculations using the B3LYP/6-31G(d) level of theory implemented in Gaussian 09.<sup>1</sup> The electronic excited states were calculated using the TD-DFT(B3LYP/6-31G(d)) method. Electron density difference maps (EDDM) were calculated by GAUSSSUM 3.0 program package<sup>2</sup> using results of TD-DFT. The calculated excited states are summarized in Tables S25. Representative molecular orbitals (MOs) are shown in Figs S27. The molecular orbitals involved in the dominant electron transitions and EDDM of the excited states for **1** is shown in Figs S28. The results suggested that **1** showed intramolecular charge-transfer (ICT) character.

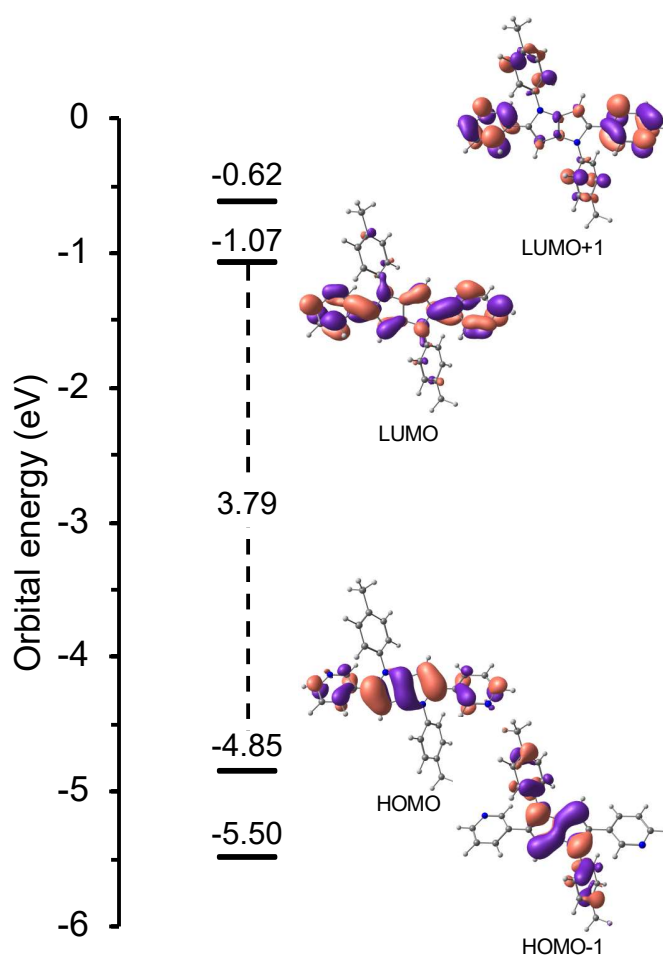

**Fig. S30** Molecular orbital of **1**.

**Table S25** Low-lying spin-singlet excited states of the **1** calculated using the B3LYP/6-31G(d) method.

| State    | $\Delta E$ (eV) | $\lambda$ (nm) | $f$    | Configuration     |           |          |
|----------|-----------------|----------------|--------|-------------------|-----------|----------|
|          |                 |                |        | Occ. MO           | Unocc. MO | Coeff    |
| Trans. 1 | 3.4539          | 359            | 0.8284 | 116 $\rightarrow$ | 117       | 0.69358  |
|          |                 |                |        | 116 $\rightarrow$ | 119       | -0.11480 |
| Trans. 3 | 3.7953          | 327            | 0.1137 | 116 $\rightarrow$ | 117       | 0.11303  |
|          |                 |                |        | 116 $\rightarrow$ | 119       | 0.69231  |
| Trans. 4 | 3.9064          | 317            | 0.1405 | 115 $\rightarrow$ | 117       | 0.69831  |

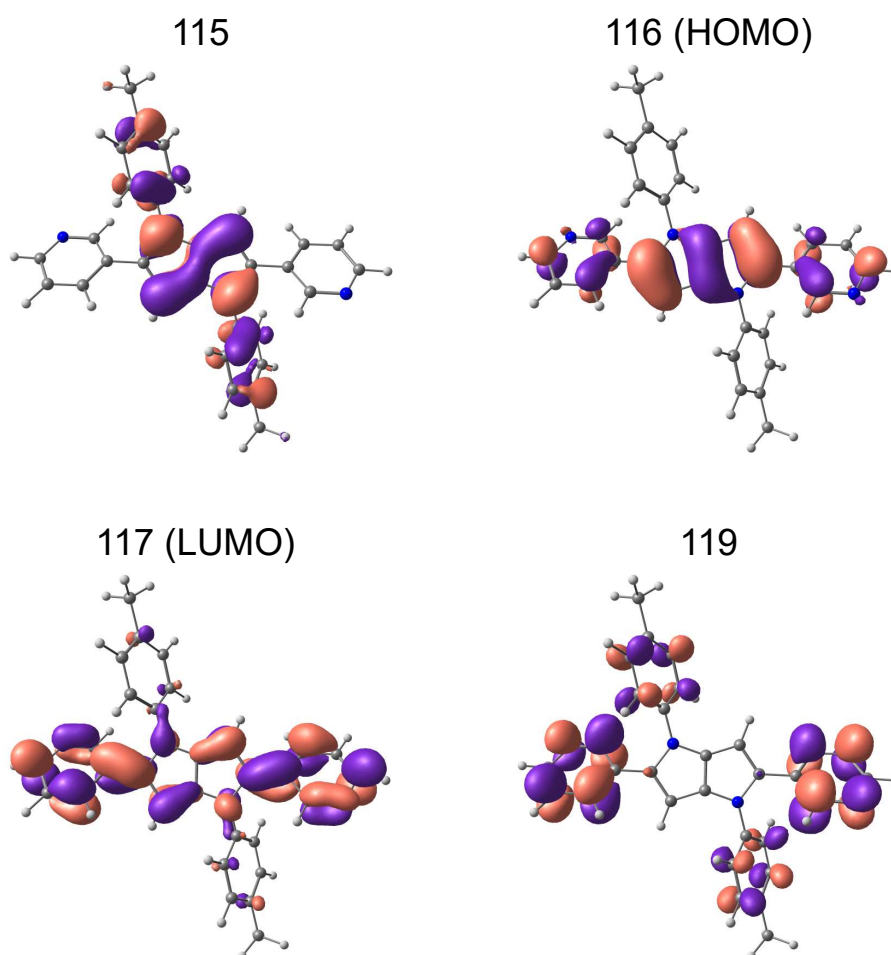

**Fig. S31** Representative MOs of the **1**.

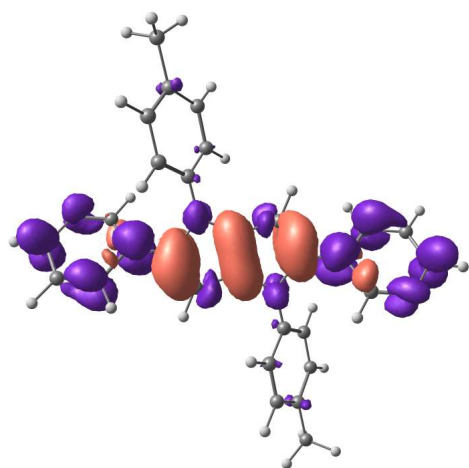

Transition 1

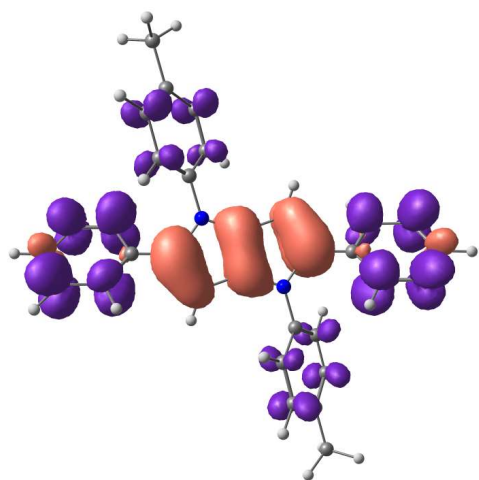

Transition 3

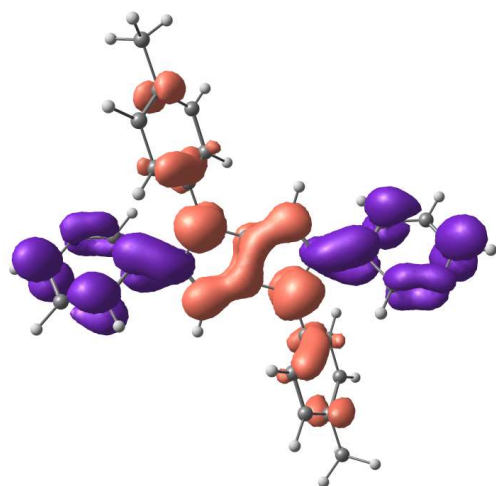

Transition 4

**Fig. S32** Representative electron density difference maps (EDDM) between the electronic ground and excited states of **1**. The pink represents where the electrons are coming from, and the purple represents where the electrons are going.

Coordinates of the optimized structure of **1**

|   |              |              |              |
|---|--------------|--------------|--------------|
| N | 0.699703771  | -0.166549545 | 1.579962914  |
| N | 3.413596172  | -3.057495370 | 3.554177775  |
| C | -0.187704135 | 0.275532740  | 0.611341135  |
| C | 2.681642789  | -1.754005792 | 1.641154516  |
| C | 1.325654029  | -1.091297211 | -0.414397363 |
| H | 1.834549099  | -1.724971869 | -1.126517708 |
| C | 1.631703416  | -1.008585150 | 0.942200272  |
| C | 0.747420911  | 0.357471390  | 2.903628020  |
| C | 4.886557208  | -2.742785463 | 1.678925008  |
| H | 5.855028489  | -2.929154027 | 1.223567800  |
| C | 1.925019882  | 0.908645904  | 3.421753206  |
| H | 2.821763521  | 0.930894580  | 2.811613859  |
| C | -0.390573998 | 0.906424233  | 4.966089103  |
| H | -1.301734524 | 0.902695613  | 5.559669795  |
| C | 1.936361410  | 1.434234104  | 4.710946705  |
| H | 2.859328475  | 1.857287523  | 5.100868903  |
| C | 3.924661948  | -1.978891952 | 1.025794989  |
| H | 4.128648570  | -1.543328275 | 0.051500249  |
| C | 0.782632762  | 1.444932512  | 5.507642676  |
| C | 2.493386585  | -2.334747993 | 2.912150372  |
| H | 1.542869330  | -2.214310982 | 3.426259373  |
| C | -0.412904104 | 0.358977293  | 3.683729034  |
| H | -1.325203598 | -0.074639546 | 3.285241716  |
| C | 4.589275663  | -3.253551545 | 2.942814410  |
| H | 5.321256765  | -3.846883265 | 3.488270686  |
| C | 0.814816624  | 2.000370034  | 6.912167097  |
| H | 1.425076522  | 2.908642355  | 6.970517514  |
| H | 1.245507573  | 1.276366650  | 7.616515932  |
| H | -0.190543530 | 2.245732273  | 7.269299985  |
| N | -0.699703771 | 0.166549545  | -1.579962914 |
| N | -3.413596172 | 3.057495370  | -3.554177775 |
| C | 0.187704135  | -0.275532740 | -0.611341135 |
| C | -2.681642789 | 1.754005792  | -1.641154516 |
| C | -1.325654029 | 1.091297211  | 0.414397363  |

|   |              |              |              |
|---|--------------|--------------|--------------|
| H | -1.834549099 | 1.724971869  | 1.126517708  |
| C | -1.631703416 | 1.008585150  | -0.942200272 |
| C | -0.747420911 | -0.357471390 | -2.903628020 |
| C | -4.886557208 | 2.742785463  | -1.678925008 |
| H | -5.855028489 | 2.929154027  | -1.223567800 |
| C | -1.925019882 | -0.908645904 | -3.421753206 |
| H | -2.821763521 | -0.930894580 | -2.811613859 |
| C | 0.390573998  | -0.906424233 | -4.966089103 |
| H | 1.301734524  | -0.902695613 | -5.559669795 |
| C | -1.936361410 | -1.434234104 | -4.710946705 |
| H | -2.859328475 | -1.857287523 | -5.100868903 |
| C | -3.924661948 | 1.978891952  | -1.025794989 |
| H | -4.128648570 | 1.543328275  | -0.051500249 |
| C | -0.782632762 | -1.444932512 | -5.507642676 |
| C | -2.493386585 | 2.334747993  | -2.912150372 |
| H | -1.542869330 | 2.214310982  | -3.426259373 |
| C | 0.412904104  | -0.358977293 | -3.683729034 |
| H | 1.325203598  | 0.074639546  | -3.285241716 |
| C | -4.589275663 | 3.253551545  | -2.942814410 |
| H | -5.321256765 | 3.846883265  | -3.488270686 |
| C | -0.814816624 | -2.000370034 | -6.912167097 |
| H | -1.425076522 | -2.908642355 | -6.970517514 |
| H | -1.245507573 | -1.276366650 | -7.616515932 |
| H | 0.190543530  | -2.245732273 | -7.269299985 |

1. Frisch, M. J.; Trucks, G. W.; Schlegel, H. B.; Scuseria, G. E.; Robb, M. A.; Cheeseman, J. R.; Scalmani, G.; Barone, V.; Mennucci, B.; Petersson, G. A.; Nakatsuji, H.; Caricato, M.; Li, X.; Hratchian, H. P.; Izmaylov, A. F.; Bloino, J.; Zheng, G.; Sonnenberg, J. L.; Hada, M.; Ehara, M.; Toyota, K.; Fukuda, R.; Hasegawa, J.; Ishida, M.; Nakajima, T.; Honda, Y.; Kitao, O.; Nakai, H.; Vreven, T.; Montgomery, J. A.; Peralta, J. E., Jr.; Ogliaro, F.; Bearpark, M.; Heyd, J. J.; Brothers, E.; Kudin, K. N.; Staroverov, V. N.; Kobayashi, R.; Normand, J.; Raghavachari, K.; Rendell, A.; Burant, J. C.; Iyengar, S. S.; Tomasi, J.; Cossi, M.; Rega, N.; Millam, J. M.; Klene, M.; Knox, J. E.; Cross, J. B.; Bakken, V.; Adamo, C.; Jaramillo, J.; Gomperts, R.; Stratmann, R. E.; Yazyev, O.; Austin, A. J.; Cammi, R.; Pomelli, C.; Ochterski, J. W.; Martin, R. L.; Morokuma, K.; Zakrzewski, V. G.; Voth, G. A.; Salvador, P.; Dannenberg, J. J.; Dapprich, S.; Daniels, A. D.; Farkas, O.; Foresman, J. B.; Ortiz, J. V.; Cioslowski, J.; Fox, D. J. Gaussian 09, revision D.01; Gaussian, Inc.: Wallingford, CT, **2009**.
2. O'Boyle, N. M.; Tenderholt, A. L.; and Langner, K. M.; *J. Comp. Chem.* **2008**, *29*, 839.
